# Supplementary material for: The long noncoding RNA HORAS5 mediates castration‐resistant prostate cancer survival by activating the androgen receptor transcriptional program
Source: PubMed Central journal article supplement (PMC6487714; doi:10.1002/1878-0261.12471), 2019-03-05
Supplement: MOL2-13-1121-s004.pdf [file MOL2-13-1121-s004.pdf]

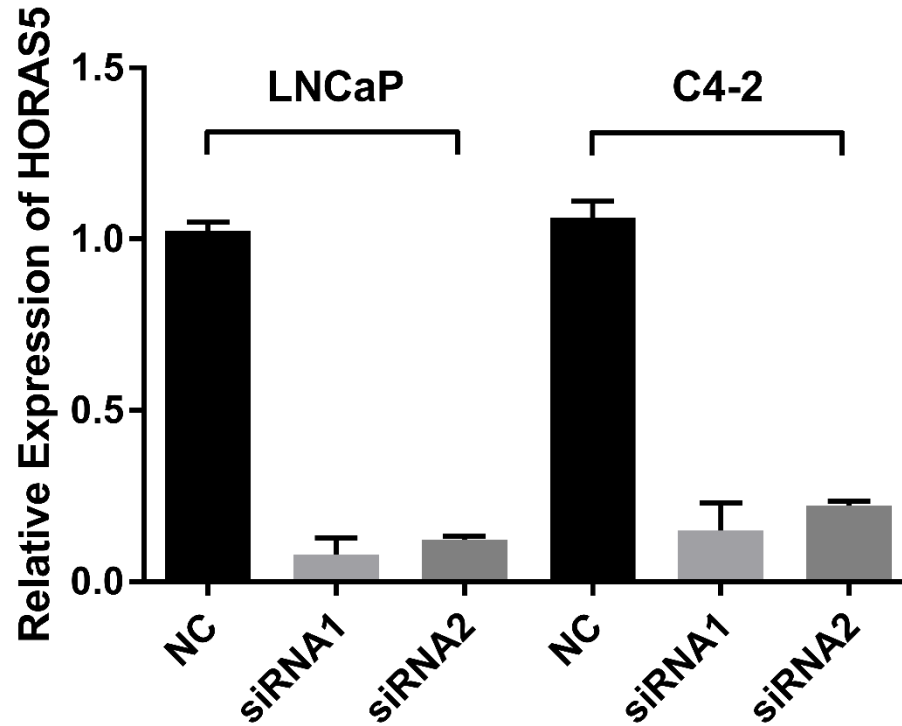

**Supplementary Figure 4 | *HORAS5* short transcript knockdown in two prostate cancer cell lines.** LNCaP and C4-2 cells were treated with either a NC scramble or anti-*HORAS5* siRNAs for 48hrs prior to qPCR analysis. Data is depicted as means  $\pm$  S.D. from a representative experiment.
