# Supplementary material for: The long noncoding RNA HORAS5 mediates castration‐resistant prostate cancer survival by activating the androgen receptor transcriptional program
Source: PubMed Central journal article supplement (PMC6487714; doi:10.1002/1878-0261.12471), 2019-03-05
Supplement: MOL2-13-1121-s005.pdf [file MOL2-13-1121-s005.pdf]

**A**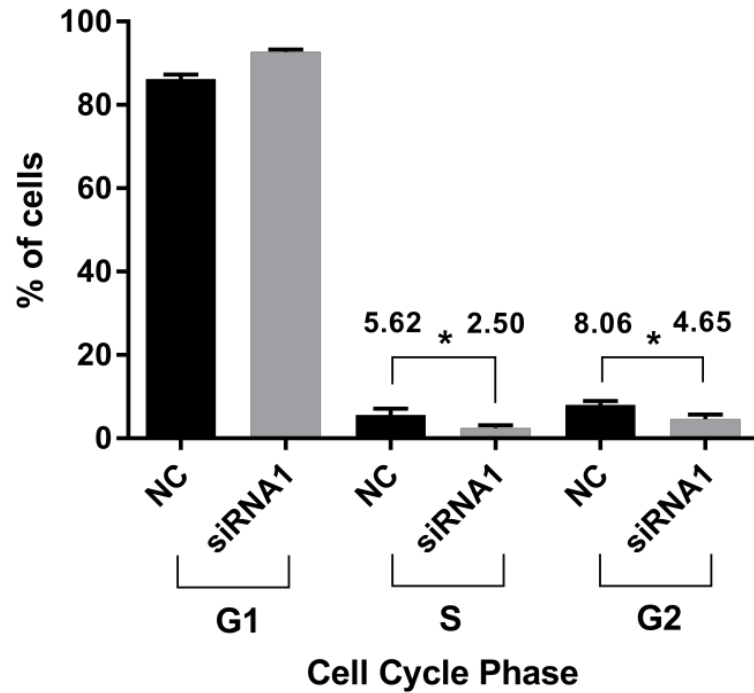**B**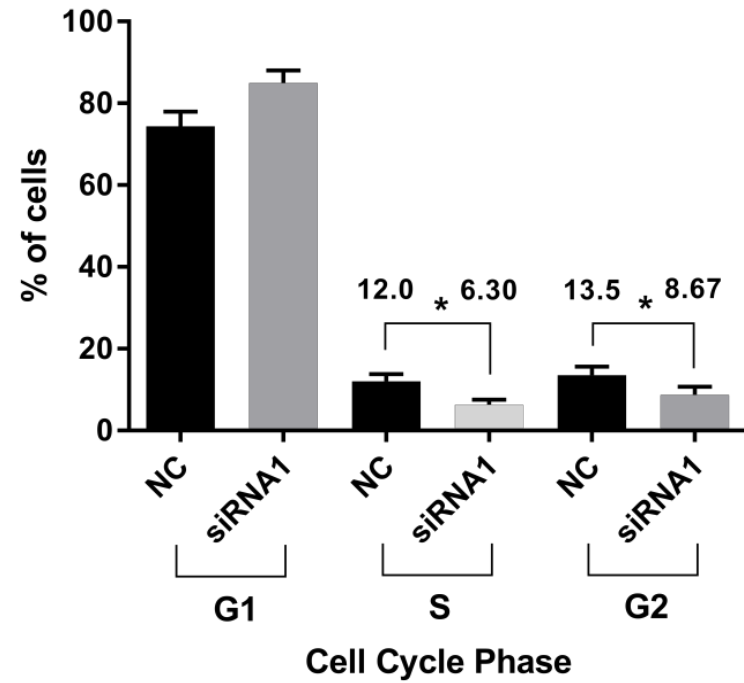

**Supplementary Figure 5 | *HORAS5* knockdown affects cell cycle progression *in vitro*.** (A,B) Fraction of LNCaP (A) and C4-2 (B) cells in different phases of the cell cycle 72hrs post-knockdown of *HORAS5*. Student *t*-test were used to measure significance, \**P*<0.05. Cell cycle data shown as means ± S.D. from three independent experiments.
