# Supplementary material for: The long noncoding RNA HORAS5 mediates castration‐resistant prostate cancer survival by activating the androgen receptor transcriptional program
Source: PubMed Central journal article supplement (PMC6487714; doi:10.1002/1878-0261.12471), 2019-03-05
Supplement: MOL2-13-1121-s006.pdf [file MOL2-13-1121-s006.pdf]

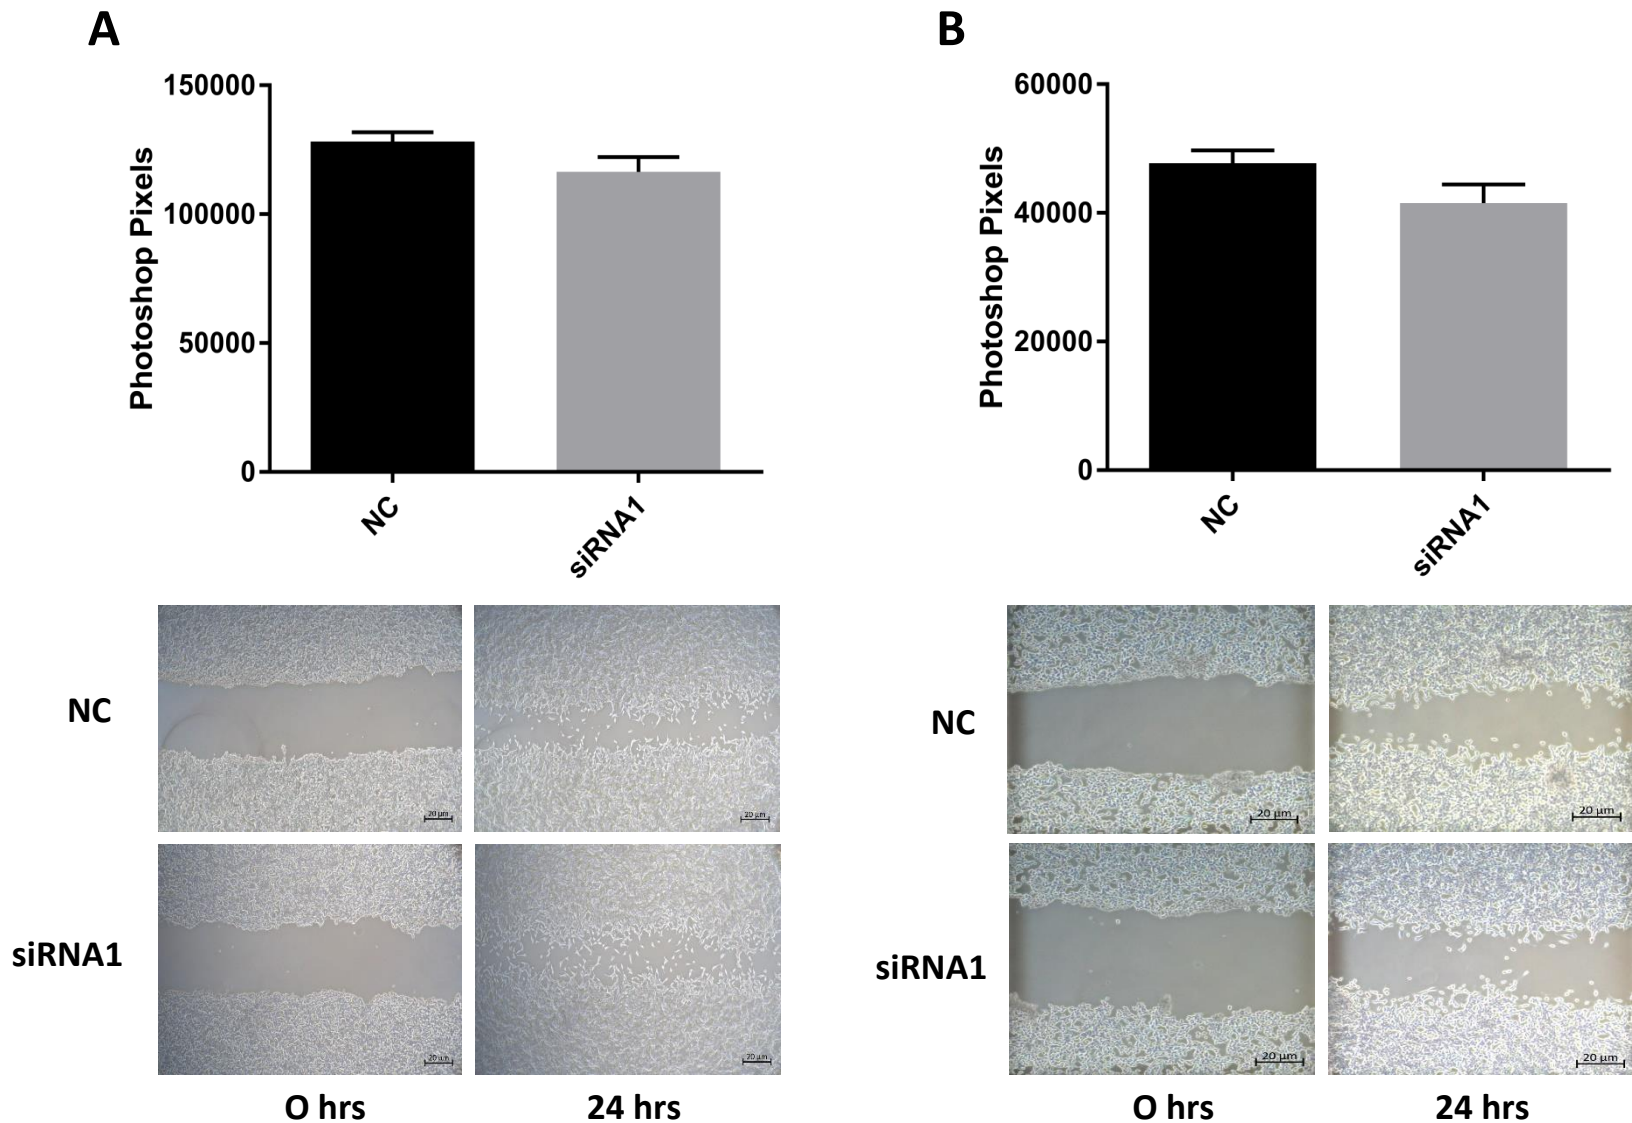

**Supplementary Figure 6 | *HORAS5* silencing does not alter cell migration potential. (A,B)** Wound-healing (scratch) assays following 18hr knockdown of *HORAS5* in LNCaP (A) and C4-2 (B) cells. Results are shown as means  $\pm$  S.D. from three independent experiments. Significance tested using a Student's *t*-test. Counted by BioRad cell counter and plated at  $2.0 \times 10^6$  cells per 6-well for LNCaP cells, and  $3.5 \times 10^6$  cells per 60mm dish for C4-2 cells. Only LNCaP cells in 6-well plates required pre-coating with poly-L-lysine for 4 hours (rinsed with dH2O after coating). Cells were left in RPMI-1640 serum-free for 24 hours post-scratch prior to image capture with AxioVision camera and photoshop pixel quantification. The scale bars shown the 20  $\mu$ m width.
