# Supplementary material for: The long noncoding RNA HORAS5 mediates castration‐resistant prostate cancer survival by activating the androgen receptor transcriptional program
Source: PubMed Central journal article supplement (PMC6487714; doi:10.1002/1878-0261.12471), 2019-03-05
Supplement: MOL2-13-1121-s007.pdf [file MOL2-13-1121-s007.pdf]

**A**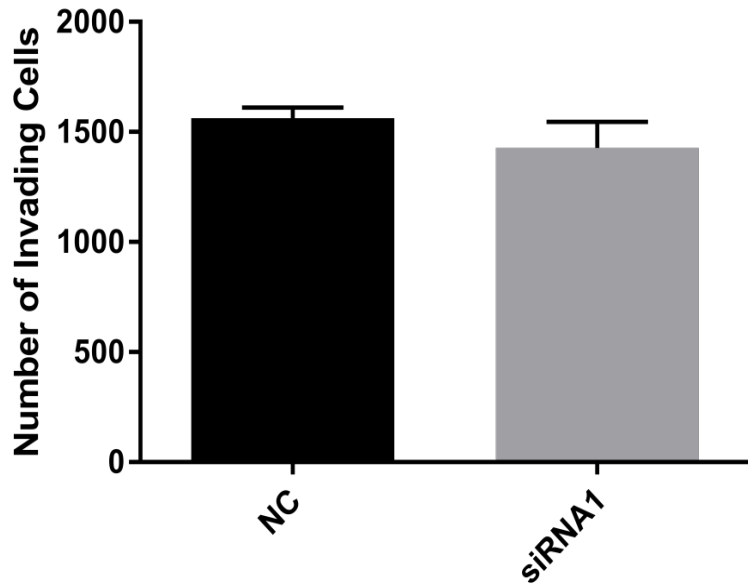**B**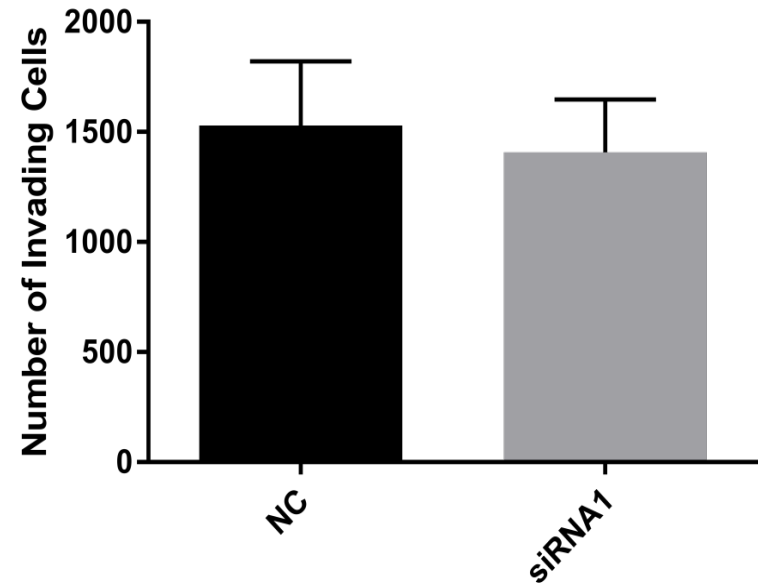

**Supplementary Figure 7 | *HORAS5* silencing does not mediate cellular invasion.** LNCaP (A) and C4-2 (B) cell invasive potential examined after 18hr knockdown of *HORAS5*. Boyden chamber 48-well invasion assays were utilized and results are shown as means  $\pm$  S.D. from three independent trials. Significance tested using a Student's *t*-test.
