# Supplementary material for: The long noncoding RNA HORAS5 mediates castration‐resistant prostate cancer survival by activating the androgen receptor transcriptional program
Source: PubMed Central journal article supplement (PMC6487714; doi:10.1002/1878-0261.12471), 2019-03-05
Supplement: MOL2-13-1121-s008.pdf [file MOL2-13-1121-s008.pdf]

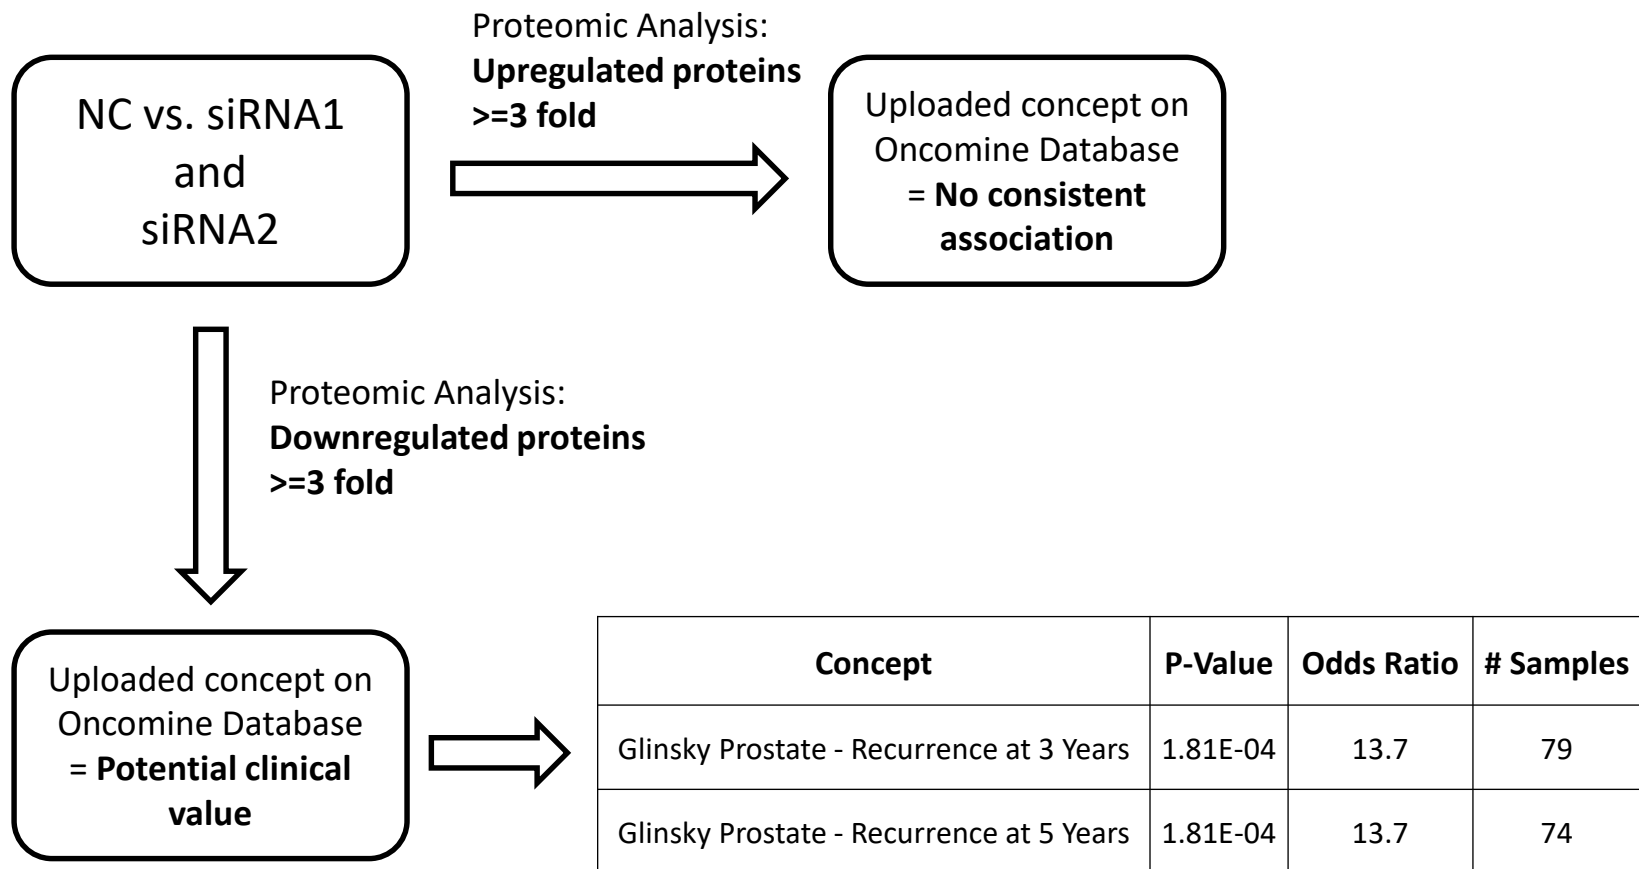

**Supplementary Figure 8 | Proteins down-regulated in response to *HORAS5* knockdown are associated with clinical PCa recurrence.** Differentially expressed protein genes (Supplemental tables 3 and 4) identified from *in vitro* knockdown of *HORAS5* in LNCaP cells followed by MS/MS proteomics analysis were investigated for clinical associations using the Oncomine web portal. Proteins up and down-regulated ( $\geq 3$ -fold) in LTL313BR *versus* LTL313B were uploaded into Oncomine separately, and only significant clinical associations are reported above.
