# Supplementary material for: The long noncoding RNA HORAS5 mediates castration‐resistant prostate cancer survival by activating the androgen receptor transcriptional program
Source: PubMed Central journal article supplement (PMC6487714; doi:10.1002/1878-0261.12471), 2019-03-05
Supplement: MOL2-13-1121-s009.pdf [file MOL2-13-1121-s009.pdf]

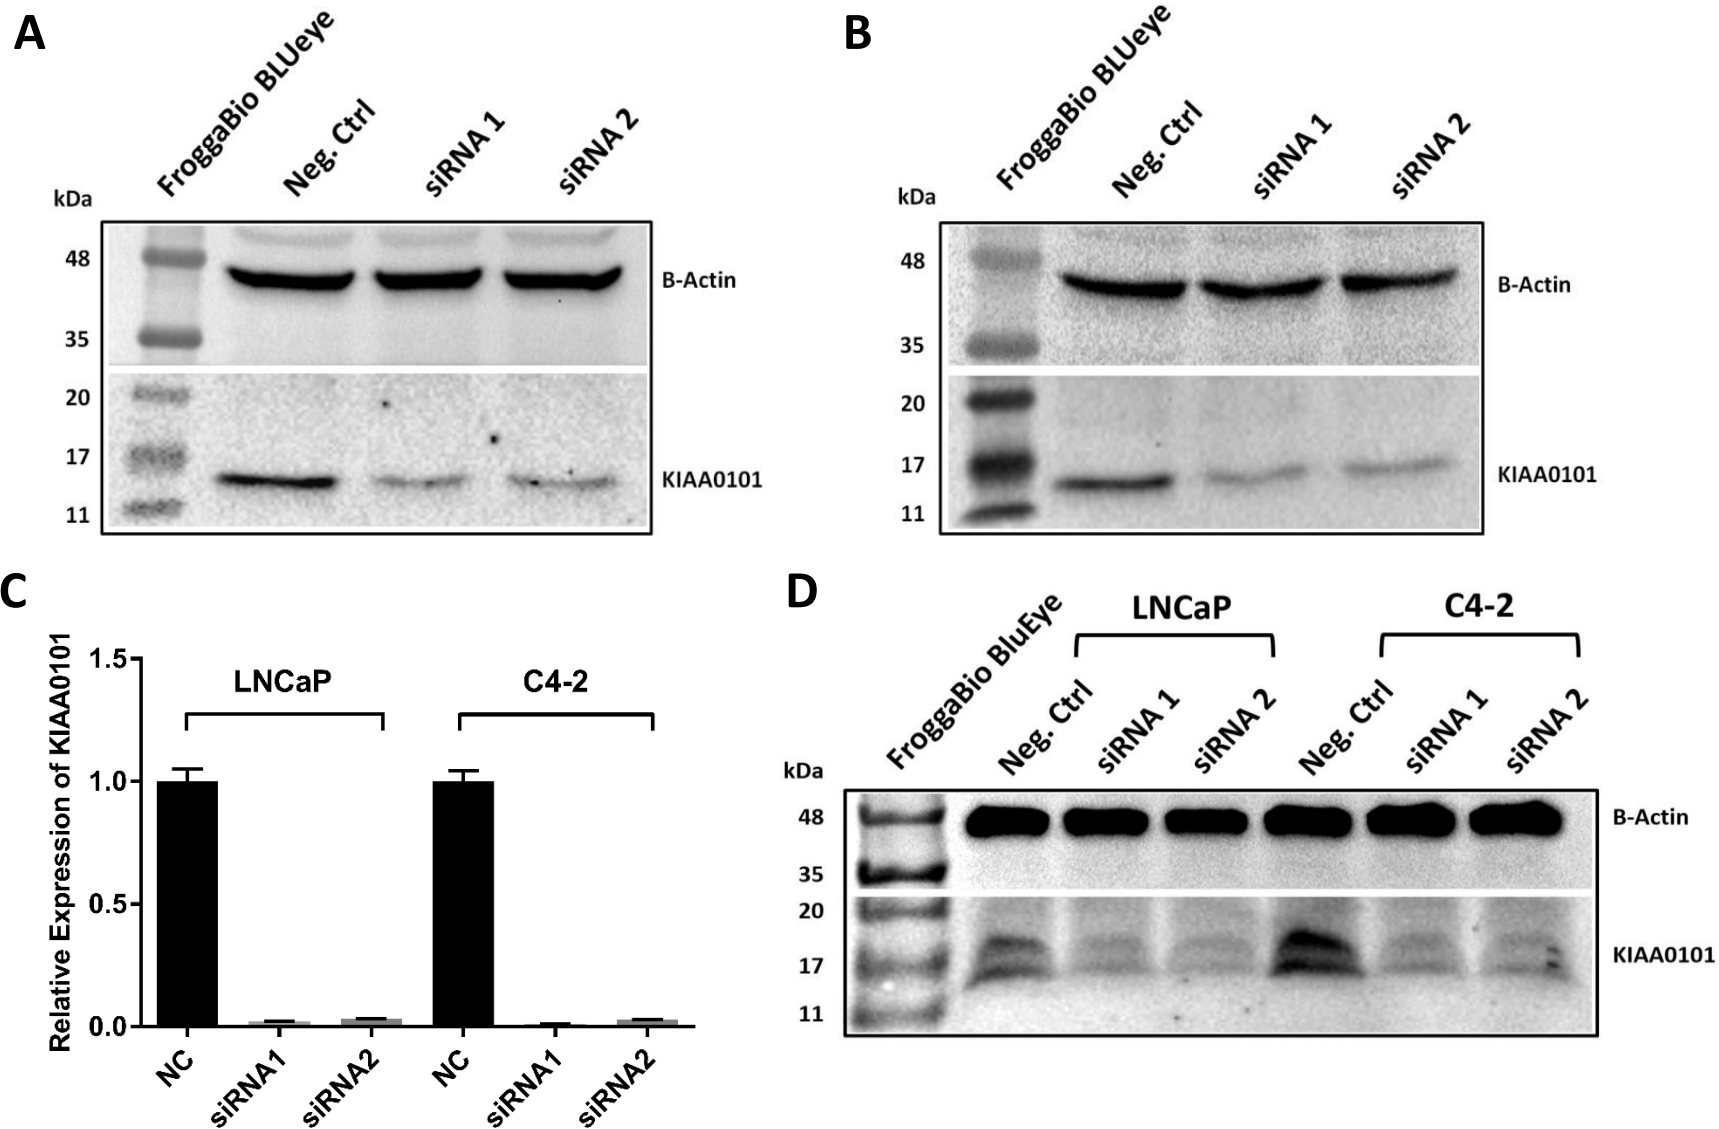

**Supplementary Figure 9 | KIAA0101 knockdown in CRPC-derived PCa cells. (A,B)** Immunoblots showing B-Actin (control) and KIAA0101 protein expression 72 hours after knockdown of *HORAS5* in LNCaP (A) and C4-2 (B) cells. (C) Relative mRNA expression (qPCR) of *KIAA0101* post knockdown in LNCaP and C4-2 cells. Results are from a representative sample. (D) Immunoblot showing B-Actin (control) and KIAA0101 protein expression 72 hours after knockdown of *KIAA0101* by control and targeted DsiRNAs in LNCaP and C4-2 cells. All blot were cut for primary antibody incubation, and have been boxed to indicate results which are from the same run.
