# Supplementary material for: The long noncoding RNA HORAS5 mediates castration‐resistant prostate cancer survival by activating the androgen receptor transcriptional program
Source: PubMed Central journal article supplement (PMC6487714; doi:10.1002/1878-0261.12471), 2019-03-05
Supplement: MOL2-13-1121-s011.pdf [file MOL2-13-1121-s011.pdf]

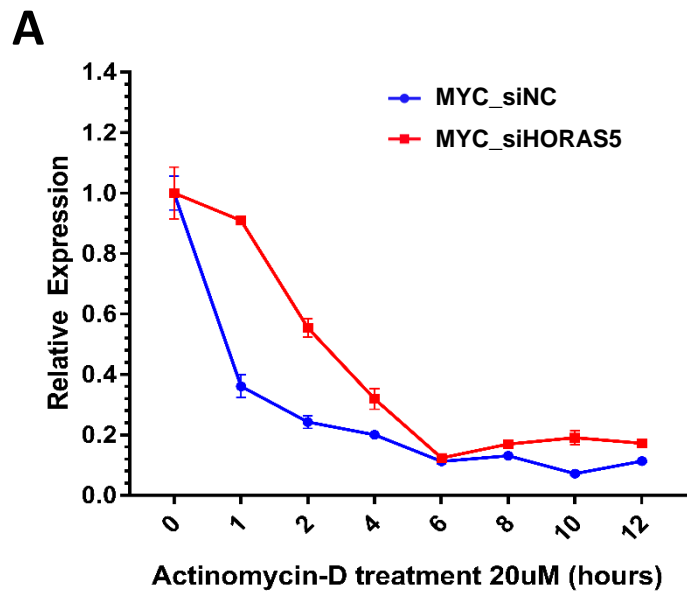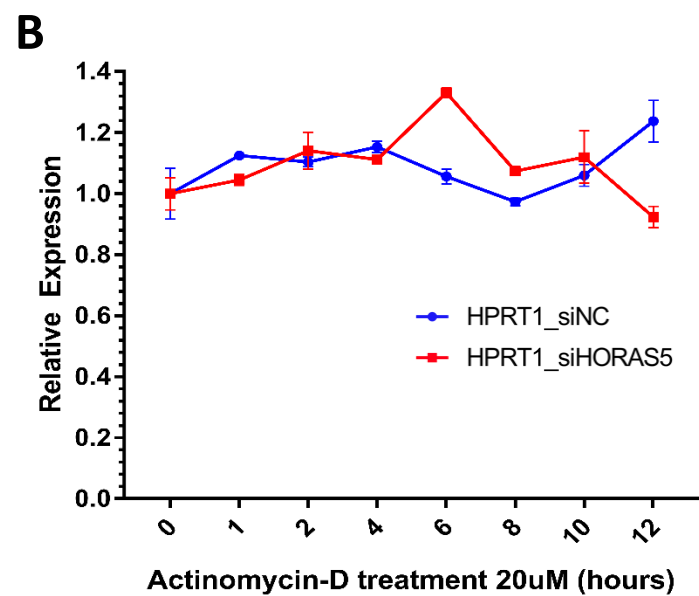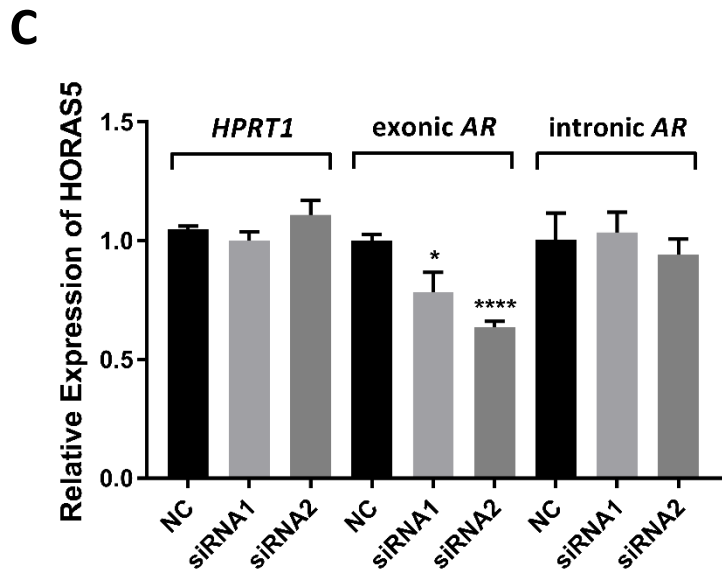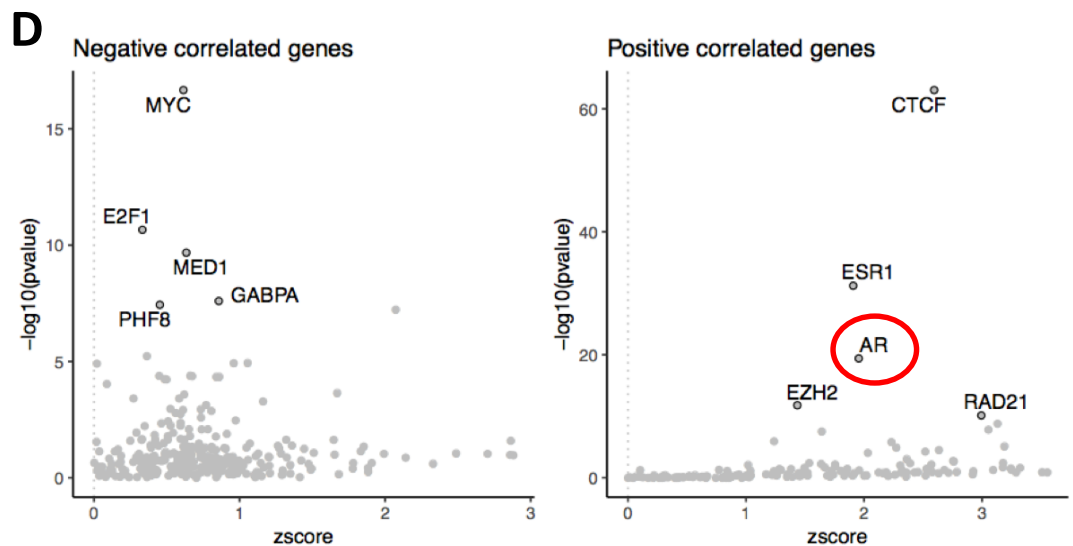

**Supplementary Figure 11 | Functional regulation of AR activity by *HORAS5*.** (A,B) Relative expression (qPCR) of (A) *MYC* or (B) *HPRT1* mRNA in LNCaP treated with either *HORAS5*-targeting or control siRNA (5nM for 24h), followed by treatment with the transcriptional inhibitor Actinomycin-D (20uM) for increasing durations. (C) Relative expression (qPCR) of mature (exonic) or premature (intronic) AR RNA in LNCaP cells treated with either control or *HORAS5*-targeting siRNA (5nM) for 72h. \* $p < 0.05$ ; \*\*\*\* $p < 0.0001$  (two-way ANOVA and Tukey's test). (D) BART transcription factor prediction results of genes either negatively or positively correlated with *HORAS5* expression in the TCGA PCa tumors ( $n=499$ ; data accessed through cBioportal). AR is highlighted in red.
