# Supplementary material for: The long noncoding RNA HORAS5 mediates castration‐resistant prostate cancer survival by activating the androgen receptor transcriptional program
Source: PubMed Central journal article supplement (PMC6487714; doi:10.1002/1878-0261.12471), 2019-03-05
Supplement: MOL2-13-1121-s012.pdf [file MOL2-13-1121-s012.pdf]

**A**

| ENSG00000226935.2 ( <i>HORASS5</i> ) (lncRNA, intergenic) |                |           |                   |        |              |         |             |
|-----------------------------------------------------------|----------------|-----------|-------------------|--------|--------------|---------|-------------|
| microRNA family                                           | Seed position  | Seed type | Transcript region | Repeat | Conservation |         |             |
|                                                           |                |           |                   |        | Primates     | Mammals | Other vert. |
| miR-9/9ab                                                 | chr21:29911987 | 8-mer     | ncRNA             | yes    | 78%          | 0%      | 0%          |
| miR-139-5p                                                | chr21:29912392 | 8-mer     | ncRNA             | no     | 0%           | 0%      | 0%          |
| miR-145                                                   | chr21:29912166 | 7-mer-A1  | ncRNA             | yes    | 22%          | 0%      | 0%          |
| miR-18ab/4735-3p                                          | chr21:29912073 | 7-mer-m8  | ncRNA             | yes    | 33%          | 0%      | 0%          |
| miR-194                                                   | chr21:29912154 | 7-mer-A1  | ncRNA             | yes    | 56%          | 0%      | 0%          |
| miR-199ab-5p                                              | chr21:29912165 | 7-mer-A1  | ncRNA             | yes    | 22%          | 0%      | 0%          |
| miR-205/205ab                                             | chr21:29911944 | 7-mer-m8  | ncRNA             | yes    | 56%          | 0%      | 0%          |
| miR-208ab/208ab-3p                                        | chr21:29912579 | 7-mer-A1  | ncRNA             | yes    | 33%          | 0%      | 0%          |
| miR-214/761/3619-5p                                       | chr21:29912066 | 7-mer-m8  | ncRNA             | yes    | 67%          | 0%      | 0%          |
| miR-23abc/23b-3p                                          | chr21:29911873 | 7-mer-m8  | ncRNA             | yes    | 56%          | 0%      | 0%          |
| miR-23abc/23b-3p                                          | chr21:29911935 | 7-mer-A1  | ncRNA             | yes    | 56%          | 0%      | 0%          |
| miR-26ab/1297/4465                                        | chr21:29911846 | 7-mer-m8  | ncRNA             | yes    | 44%          | 0%      | 0%          |
| miR-27abc/27a-3p                                          | chr21:29911886 | 7-mer-A1  | ncRNA             | yes    | 33%          | 0%      | 0%          |
| miR-27abc/27a-3p                                          | chr21:29912104 | 7-mer-m8  | ncRNA             | yes    | 78%          | 0%      | 0%          |
| miR-30abcdef/30abe-5p/384-5p                              | chr21:29911665 | 7-mer-A1  | ncRNA             | no     | 44%          | 0%      | 0%          |
| miR-33a-3p/365/365-3p                                     | chr21:29912518 | 7-mer-m8  | ncRNA             | no     | 33%          | 0%      | 0%          |
| miR-128/128ab                                             | chr21:29912103 | 7-mer-A1  | ncRNA             | yes    | 78%          | 0%      | 0%          |
| miR-499-5p                                                | chr21:29912579 | 8-mer     | ncRNA             | yes    | 33%          | 0%      | 0%          |

**B**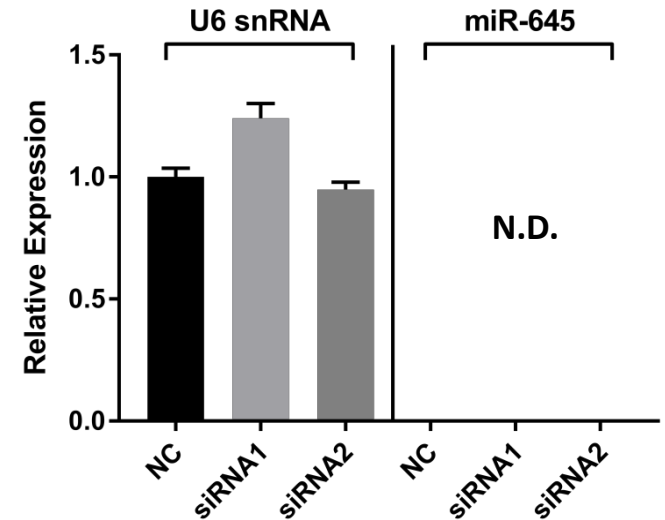

**Supplementary Figure 12 | *HORASS5*-miRNA interaction predictions. (A)** Table adapted from miRcode.org representing potential transcriptome-wide *HORASS5*-miRNA interactions based on UCSC GRCh37/hg19 genome assembly. **(B)** Relative expression (qPCR) of *U6 snRNA* and *miR-645* in LNCaP cells treated with either *HORASS5*-targeting or control siRNAs for 72hrs. Data shown as a representative replicate.
