# Supplementary material for: The long noncoding RNA HORAS5 mediates castration‐resistant prostate cancer survival by activating the androgen receptor transcriptional program
Source: PubMed Central journal article supplement (PMC6487714; doi:10.1002/1878-0261.12471), 2019-03-05
Supplement: MOL2-13-1121-s013.pdf [file MOL2-13-1121-s013.pdf]

**Supplemental Table 1: LincRNAs up-regulated in LTL-313BR (hormone-independent) vs LTL-313B (hormone-dependent)**

| GENE ID           | Gene Symbol    | Gene Type | LTL-313B (RPKM) | LTL-313BR (RPKM) | fold-change (BR/B) | log2fold-change (BR/B) | HORAS ID |
|-------------------|----------------|-----------|-----------------|------------------|--------------------|------------------------|----------|
| ENSG00000255193.1 | RP11-945A11.1  | lincRNA   | 0.9895          | 62.6646          | 63.33              | 5.98                   | HORAS1   |
| ENSG00000232855.2 | AF131217.1     | lincRNA   | 0.5515          | 20.3796          | 36.95              | 5.21                   | HORAS2   |
| ENSG00000236532.1 | AL035610.2     | lincRNA   | 1.5896          | 52.1518          | 32.81              | 5.04                   | HORAS3   |
| ENSG00000178457.3 | LINC00314      | lincRNA   | 0.4380          | 5.5459           | 12.66              | 3.66                   | HORAS4   |
| ENSG00000226935.2 | LINC00161      | lincRNA   | 0.7137          | 8.9314           | 12.51              | 3.65                   | HORAS5   |
| ENSG00000225298.1 | LINC00113      | lincRNA   | 0.5839          | 5.6462           | 9.67               | 3.27                   | HORAS6   |
| ENSG00000272216.1 | LL22NC03-2H8.5 | lincRNA   | 3.6172          | 30.8479          | 8.53               | 3.09                   | HORAS7   |
| ENSG00000263427.1 | RP11-599B13.3  | lincRNA   | 1.5085          | 12.6955          | 8.42               | 3.07                   | HORAS8   |
| ENSG00000234083.1 | AJ006995.3     | lincRNA   | 0.4542          | 3.7196           | 8.19               | 3.03                   | HORAS9   |
| ENSG00000260896.1 | RP11-314O13.1  | lincRNA   | 1.5896          | 12.4951          | 7.86               | 2.97                   | HORAS10  |
| ENSG00000227683.1 | RP11-445N18.5  | lincRNA   | 1.4599          | 11.1587          | 7.64               | 2.93                   | HORAS11  |
| ENSG00000272168.1 | CASC15         | lincRNA   | 0.6002          | 4.2430           | 7.07               | 2.82                   | HORAS12  |
| ENSG00000250266.1 | RP11-789C1.1   | lincRNA   | 0.6813          | 4.1873           | 6.15               | 2.62                   | HORAS13  |
| ENSG00000244649.2 | CTD-2377D24.6  | lincRNA   | 0.7786          | 4.6383           | 5.96               | 2.57                   | HORAS14  |
| ENSG00000255418.1 | RP11-266A24.1  | lincRNA   | 0.8759          | 4.9501           | 5.65               | 2.50                   | HORAS15  |
| ENSG00000225783.2 | MIAT           | lincRNA   | 1.8330          | 10.3569          | 5.65               | 2.50                   | HORAS16  |
| ENSG00000239268.2 | RP11-384F7.2   | lincRNA   | 1.9303          | 10.2900          | 5.33               | 2.41                   | HORAS17  |
| ENSG00000260884.1 | AC009120.5     | lincRNA   | 0.5191          | 2.7618           | 5.32               | 2.41                   | HORAS18  |
| ENSG00000234052.1 | AP001607.1     | lincRNA   | 0.4055          | 2.0936           | 5.16               | 2.37                   | HORAS19  |
| ENSG00000231236.2 | AP001604.3     | lincRNA   | 0.4542          | 2.3052           | 5.08               | 2.34                   | HORAS20  |
| ENSG00000258188.1 | RP11-146E13.4  | lincRNA   | 0.9084          | 4.5993           | 5.06               | 2.34                   | HORAS21  |
| ENSG00000261104.1 | RP11-734K21.5  | lincRNA   | 0.6164          | 3.0959           | 5.02               | 2.33                   | HORAS22  |
| ENSG00000254861.1 | RP11-945A11.2  | lincRNA   | 0.4055          | 2.0268           | 5.00               | 2.32                   | HORAS23  |
| ENSG00000237567.1 | RP3-359N14.2   | lincRNA   | 0.4380          | 2.1772           | 4.97               | 2.31                   | HORAS24  |
| ENSG00000268362.1 | CTD-2017D11.1  | lincRNA   | 2.6115          | 12.7456          | 4.88               | 2.29                   | HORAS25  |
| ENSG00000215386.6 | LINC00478      | lincRNA   | 3.1144          | 14.4718          | 4.65               | 2.22                   | HORAS26  |
| ENSG00000251321.1 | PCAT4          | lincRNA   | 0.4217          | 1.9433           | 4.61               | 2.20                   | HORAS27  |
| ENSG00000247095.2 | MIR210HG       | lincRNA   | 10.4462         | 47.1182          | 4.51               | 2.17                   | HORAS28  |
| ENSG00000228741.2 | RP11-309I15.1  | lincRNA   | 1.3463          | 6.0025           | 4.46               | 2.16                   | HORAS29  |
| ENSG00000205662.2 | RP11-706O15.7  | lincRNA   | 0.4217          | 1.8208           | 4.32               | 2.11                   | HORAS30  |
| ENSG00000234630.1 | LL22NC03-2H8.4 | lincRNA   | 4.1525          | 17.5621          | 4.23               | 2.08                   | HORAS31  |
| ENSG00000261069.2 | SNORD116-20    | lincRNA   | 1.1517          | 4.7998           | 4.17               | 2.06                   | HORAS32  |
| ENSG00000228434.1 | AC004951.6     | lincRNA   | 0.6651          | 2.6950           | 4.05               | 2.02                   | HORAS33  |
| ENSG00000215244.2 | RP11-563J2.2   | lincRNA   | 0.6164          | 2.4890           | 4.04               | 2.01                   | HORAS34  |
| ENSG00000235499.1 | AC073046.25    | lincRNA   | 1.2003          | 4.7163           | 3.93               | 1.97                   | HORAS35  |
| ENSG00000261770.1 | CTC-459F4.1    | lincRNA   | 7.0560          | 27.6072          | 3.91               | 1.97                   | HORAS36  |
| ENSG00000237094.7 | RP4-669L17.10  | lincRNA   | 1.2003          | 4.6105           | 3.84               | 1.94                   | HORAS37  |
| ENSG00000267350.2 | RP1-178F10.3   | lincRNA   | 12.3116         | 46.6449          | 3.79               | 1.92                   | HORAS38  |
| ENSG00000250387.2 | RP11-136K7.2   | lincRNA   | 0.9084          | 3.3242           | 3.66               | 1.87                   | HORAS39  |
| ENSG00000237807.3 | RP11-400K9.4   | lincRNA   | 1.7356          | 6.2809           | 3.62               | 1.86                   | HORAS40  |
| ENSG00000262745.1 | CTD-2377D24.8  | lincRNA   | 0.6164          | 2.2161           | 3.60               | 1.85                   | HORAS41  |
| ENSG00000233878.1 | AC073133.1     | lincRNA   | 4.1201          | 14.8003          | 3.59               | 1.84                   | HORAS42  |
| ENSG00000255989.1 | RP11-711M9.1   | lincRNA   | 0.6164          | 2.2050           | 3.58               | 1.84                   | HORAS43  |
| ENSG00000268658.1 | LINC00664      | lincRNA   | 1.2814          | 4.5158           | 3.52               | 1.82                   | HORAS44  |
| ENSG00000261275.1 | RP11-760D2.11  | lincRNA   | 2.9197          | 10.2344          | 3.51               | 1.81                   | HORAS45  |
| ENSG00000254084.1 | KB-1930G5.4    | lincRNA   | 0.7624          | 2.5892           | 3.40               | 1.76                   | HORAS46  |
| ENSG00000197332.7 | ZNF833P        | lincRNA   | 0.8921          | 3.0068           | 3.37               | 1.75                   | HORAS47  |

|                   |               |         |         |         |      |      |                |
|-------------------|---------------|---------|---------|---------|------|------|----------------|
| ENSG00000213793.3 | ZNF888        | lincRNA | 1.2490  | 4.0982  | 3.28 | 1.71 | <i>HORAS48</i> |
| ENSG00000235373.1 | RP11-206L10.3 | lincRNA | 0.4704  | 1.5313  | 3.26 | 1.70 | <i>HORAS49</i> |
| ENSG00000257151.1 | PWAR6         | lincRNA | 17.8915 | 57.8537 | 3.23 | 1.69 | <i>HORAS50</i> |
| ENSG00000261452.1 | RP11-509E16.1 | lincRNA | 1.0544  | 3.3910  | 3.22 | 1.69 | <i>HORAS51</i> |
| ENSG00000261400.1 | AC011525.2    | lincRNA | 1.8005  | 5.7353  | 3.19 | 1.67 | <i>HORAS52</i> |
| ENSG00000258593.2 | CTD-3051D23.4 | lincRNA | 0.7624  | 2.4166  | 3.17 | 1.66 | <i>HORAS53</i> |
| ENSG00000261804.1 | RP11-44F14.2  | lincRNA | 2.0114  | 6.2197  | 3.09 | 1.63 | <i>HORAS54</i> |
| ENSG00000246465.1 | RP11-57A19.2  | lincRNA | 1.5248  | 4.6884  | 3.07 | 1.62 | <i>HORAS55</i> |
| ENSG00000235609.4 | AF127936.7    | lincRNA | 3.5686  | 10.8636 | 3.04 | 1.61 | <i>HORAS56</i> |
| ENSG00000260337.2 | RP11-386M24.6 | lincRNA | 2.1249  | 6.4257  | 3.02 | 1.60 | <i>HORAS57</i> |
