# Supplementary material for: The long noncoding RNA HORAS5 mediates castration‐resistant prostate cancer survival by activating the androgen receptor transcriptional program
Source: PubMed Central journal article supplement (PMC6487714; doi:10.1002/1878-0261.12471), 2019-03-05
Supplement: MOL2-13-1121-s014.pdf [file MOL2-13-1121-s014.pdf]

**Supplemental Table 2: LincRNAs down-regulated in LTL-313BR (hormone-independent) vs LTL-313B (hormone-dependent)**

| GENE ID            | Gene Symbol       | Gene Type | LTL-313B (RPKM) | LTL-313BR (RPKM) | fold-change (BR/B) | log2fold-change (BR/B) | HORAS ID |
|--------------------|-------------------|-----------|-----------------|------------------|--------------------|------------------------|----------|
| ENSG00000236824.1  | BCYRN1            | lincRNA   | 1378.8979       | 32.6575          | 0.02               | -5.40                  | HORAS58  |
| ENSG00000260260.1  | RP11-304L19.5     | lincRNA   | 274.6182        | 11.6487          | 0.04               | -4.56                  | HORAS59  |
| ENSG00000232388.2  | LINC00493         | lincRNA   | 111.8749        | 7.4057           | 0.07               | -3.92                  | HORAS60  |
| ENSG00000255198.3  | SNHG9             | lincRNA   | 13.9986         | 1.0580           | 0.08               | -3.73                  | HORAS61  |
| ENSG00000254139.1  | CTD-2339F6.1      | lincRNA   | 2.1249          | 0.2227           | 0.10               | -3.25                  | HORAS62  |
| ENSG00000245526.4  | LINC00461         | lincRNA   | 12.1494         | 1.4533           | 0.12               | -3.06                  | HORAS63  |
| ENSG00000270038.1  | RP11-1070N10.7    | lincRNA   | 1.0219          | 0.1503           | 0.15               | -2.76                  | HORAS64  |
| ENSG00000175701.6  | LINC00116         | lincRNA   | 7.1209          | 1.0580           | 0.15               | -2.75                  | HORAS65  |
| ENSG00000273406.1  | RP11-114O18.1     | lincRNA   | 1.3950          | 0.2172           | 0.16               | -2.68                  | HORAS66  |
| ENSG00000180279.5  | CTD-2568A17.5     | lincRNA   | 3.6010          | 0.5791           | 0.16               | -2.64                  | HORAS67  |
| ENSG00000272048.1  | RP11-458N5.1      | lincRNA   | 4.8176          | 0.8241           | 0.17               | -2.55                  | HORAS68  |
| ENSG00000228065.6  | RP11-222A11.1     | lincRNA   | 0.9570          | 0.1670           | 0.17               | -2.52                  | HORAS69  |
| ENSG00000249599.1  | RP11-168E14.1     | lincRNA   | 6.2775          | 1.1359           | 0.18               | -2.47                  | HORAS70  |
| ENSG00000261005.1  | CTB-58E17.1       | lincRNA   | 4.3958          | 0.8464           | 0.19               | -2.38                  | HORAS71  |
| ENSG00000182165.13 | TP53TG1           | lincRNA   | 44.8181         | 8.7978           | 0.20               | -2.35                  | HORAS72  |
| ENSG00000225760.1  | LINC00431         | lincRNA   | 1.8654          | 0.3731           | 0.20               | -2.32                  | HORAS73  |
| ENSG00000272663.1  | RP11-191L17.1     | lincRNA   | 0.9732          | 0.1949           | 0.20               | -2.32                  | HORAS74  |
| ENSG00000214546.3  | AC087491.2        | lincRNA   | 2.3682          | 0.4956           | 0.21               | -2.26                  | HORAS75  |
| ENSG00000229227.4  | RP11-38L15.2      | lincRNA   | 1.6221          | 0.3452           | 0.21               | -2.23                  | HORAS76  |
| ENSG00000229891.1  | Z83851.1          | lincRNA   | 11.5168         | 2.4779           | 0.22               | -2.22                  | HORAS77  |
| ENSG00000236081.1  | AC074389.9        | lincRNA   | 11.5817         | 2.4946           | 0.22               | -2.21                  | HORAS78  |
| ENSG00000272221.1  | XXbac-BPG181B23.7 | lincRNA   | 4.9149          | 1.0635           | 0.22               | -2.21                  | HORAS79  |
| ENSG00000234692.1  | RP11-445L6.3      | lincRNA   | 2.2871          | 0.5123           | 0.22               | -2.16                  | HORAS80  |
| ENSG00000243491.1  | RP11-521D12.5     | lincRNA   | 0.9408          | 0.2116           | 0.22               | -2.15                  | HORAS81  |
| ENSG00000271869.1  | RP11-51J9.5       | lincRNA   | 0.8110          | 0.1838           | 0.23               | -2.14                  | HORAS82  |
| ENSG00000175773.8  | RP11-121M22.1     | lincRNA   | 1.0219          | 0.2339           | 0.23               | -2.13                  | HORAS83  |
| ENSG00000224032.2  | EPB41L4A-AS1      | lincRNA   | 28.7433         | 6.6150           | 0.23               | -2.12                  | HORAS84  |
| ENSG00000231196.3  | RP11-495P10.8     | lincRNA   | 0.9084          | 0.2116           | 0.23               | -2.10                  | HORAS85  |
| ENSG00000272369.1  | RP11-446N19.1     | lincRNA   | 0.9084          | 0.2116           | 0.23               | -2.10                  | HORAS86  |
| ENSG00000272795.1  | RP11-602N24.3     | lincRNA   | 0.7137          | 0.1670           | 0.23               | -2.10                  | HORAS87  |
| ENSG00000270673.1  | YTHDF3-AS1        | lincRNA   | 5.6448          | 1.3364           | 0.24               | -2.08                  | HORAS88  |
| ENSG00000262890.1  | RP11-424M24.5     | lincRNA   | 1.2166          | 0.2895           | 0.24               | -2.07                  | HORAS89  |
| ENSG00000258927.1  | RP11-1070N10.5    | lincRNA   | 0.6975          | 0.1670           | 0.24               | -2.06                  | HORAS90  |
| ENSG00000152931.7  | PART1             | lincRNA   | 133.1241        | 31.9726          | 0.24               | -2.06                  | HORAS91  |
| ENSG00000236206.1  | RP11-306I1.2      | lincRNA   | 0.6002          | 0.1448           | 0.24               | -2.05                  | HORAS92  |
| ENSG00000226853.2  | AC010894.3        | lincRNA   | 1.6383          | 0.3953           | 0.24               | -2.05                  | HORAS93  |
| ENSG00000228106.1  | RP11-452F19.3     | lincRNA   | 4.6229          | 1.1248           | 0.24               | -2.04                  | HORAS94  |
| ENSG00000229233.1  | AC011891.5        | lincRNA   | 1.0706          | 0.2617           | 0.24               | -2.03                  | HORAS95  |
| ENSG00000253339.1  | RP11-434I12.3     | lincRNA   | 0.5677          | 0.1392           | 0.25               | -2.03                  | HORAS96  |
| ENSG00000244219.2  | GS1-259H13.2      | lincRNA   | 0.9895          | 0.2450           | 0.25               | -2.01                  | HORAS97  |
| ENSG00000272711.1  | RP11-259N19.1     | lincRNA   | 1.0057          | 0.2506           | 0.25               | -2.00                  | HORAS98  |
| ENSG00000259869.1  | AL022344.7        | lincRNA   | 7.8184          | 1.9600           | 0.25               | -2.00                  | HORAS99  |
| ENSG00000270020.1  | RP11-463O9.9      | lincRNA   | 1.0381          | 0.2617           | 0.25               | -1.99                  | HORAS100 |
| ENSG00000236129.1  | AP002856.4        | lincRNA   | 0.6164          | 0.1559           | 0.25               | -1.98                  | HORAS101 |
| ENSG00000268649.2  | MIR296            | lincRNA   | 0.6164          | 0.1559           | 0.25               | -1.98                  | HORAS102 |
| ENSG00000272452.1  | RP11-391M1.4      | lincRNA   | 25.4504         | 6.4703           | 0.25               | -1.98                  | HORAS103 |
| ENSG00000270235.1  | RP11-122K13.14    | lincRNA   | 0.5677          | 0.1448           | 0.26               | -1.97                  | HORAS104 |
| ENSG00000228959.1  | RP5-1121H13.3     | lincRNA   | 0.6326          | 0.1615           | 0.26               | -1.97                  | HORAS105 |
| ENSG00000235532.1  | LINC00402         | lincRNA   | 1.5248          | 0.3898           | 0.26               | -1.97                  | HORAS106 |

|                   |                 |         |         |        |      |       |          |
|-------------------|-----------------|---------|---------|--------|------|-------|----------|
| ENSG00000267089.1 | CTC-499B15.8    | lincRNA | 1.0381  | 0.2673 | 0.26 | -1.96 | HORAS107 |
| ENSG00000226770.1 | AC000124.1      | lincRNA | 3.3901  | 0.8742 | 0.26 | -1.96 | HORAS108 |
| ENSG00000225255.2 | LA16c-83F12.6   | lincRNA | 17.4698 | 4.5102 | 0.26 | -1.95 | HORAS109 |
| ENSG00000234182.1 | RP11-118K6.2    | lincRNA | 0.6813  | 0.1782 | 0.26 | -1.93 | HORAS110 |
| ENSG00000270988.1 | RP11-439C15.5   | lincRNA | 0.6164  | 0.1615 | 0.26 | -1.93 | HORAS111 |
| ENSG00000272525.1 | RP11-79P5.9     | lincRNA | 1.2003  | 0.3174 | 0.26 | -1.92 | HORAS112 |
| ENSG00000267440.1 | CTC-501O10.1    | lincRNA | 0.5677  | 0.1503 | 0.26 | -1.92 | HORAS113 |
| ENSG00000224961.1 | RP1-278O22.1    | lincRNA | 1.3463  | 0.3619 | 0.27 | -1.90 | HORAS114 |
| ENSG00000223715.1 | RP11-71G7.1     | lincRNA | 0.6813  | 0.1838 | 0.27 | -1.89 | HORAS115 |
| ENSG00000259711.1 | CTD-3032H12.2   | lincRNA | 0.6813  | 0.1838 | 0.27 | -1.89 | HORAS116 |
| ENSG00000260931.1 | RP11-65L3.1     | lincRNA | 1.0706  | 0.2895 | 0.27 | -1.89 | HORAS117 |
| ENSG00000246774.1 | AC004051.2      | lincRNA | 0.5515  | 0.1503 | 0.27 | -1.88 | HORAS118 |
| ENSG00000259553.2 | MIR1302-10      | lincRNA | 0.5515  | 0.1503 | 0.27 | -1.88 | HORAS119 |
| ENSG00000244459.2 | RP11-1398P2.1   | lincRNA | 0.7948  | 0.2172 | 0.27 | -1.87 | HORAS120 |
| ENSG00000267067.1 | CTB-75G16.3     | lincRNA | 0.7948  | 0.2172 | 0.27 | -1.87 | HORAS121 |
| ENSG00000228526.2 | RP3-510D11.1    | lincRNA | 0.6813  | 0.1893 | 0.28 | -1.85 | HORAS122 |
| ENSG00000255992.1 | RP11-417L19.4   | lincRNA | 0.6813  | 0.1893 | 0.28 | -1.85 | HORAS123 |
| ENSG00000226965.1 | AC003088.1      | lincRNA | 0.6002  | 0.1670 | 0.28 | -1.85 | HORAS124 |
| ENSG00000225667.1 | LINC00505       | lincRNA | 0.6164  | 0.1726 | 0.28 | -1.84 | HORAS125 |
| ENSG00000253839.1 | RP11-431D12.1   | lincRNA | 0.5353  | 0.1503 | 0.28 | -1.83 | HORAS126 |
| ENSG00000270457.1 | RP11-467C18.1   | lincRNA | 0.6326  | 0.1782 | 0.28 | -1.83 | HORAS127 |
| ENSG00000234675.1 | RP11-242F11.2   | lincRNA | 0.5677  | 0.1615 | 0.28 | -1.81 | HORAS128 |
| ENSG00000273437.1 | RP11-434H6.7    | lincRNA | 1.5248  | 0.4343 | 0.28 | -1.81 | HORAS129 |
| ENSG00000228792.2 | RP11-354K1.2    | lincRNA | 0.4866  | 0.1392 | 0.29 | -1.81 | HORAS130 |
| ENSG00000232140.1 | AC073257.1      | lincRNA | 0.4866  | 0.1392 | 0.29 | -1.81 | HORAS131 |
| ENSG00000248673.1 | CTC-419K13.1    | lincRNA | 0.4866  | 0.1392 | 0.29 | -1.81 | HORAS132 |
| ENSG00000248859.2 | RP11-375B1.3    | lincRNA | 0.4866  | 0.1392 | 0.29 | -1.81 | HORAS133 |
| ENSG00000253416.1 | RP11-48D4.2     | lincRNA | 0.4866  | 0.1392 | 0.29 | -1.81 | HORAS134 |
| ENSG00000225353.2 | RP11-292F9.1    | lincRNA | 0.5839  | 0.1670 | 0.29 | -1.81 | HORAS135 |
| ENSG00000258538.1 | RP11-753D20.3   | lincRNA | 0.4866  | 0.1392 | 0.29 | -1.81 | HORAS136 |
| ENSG00000225532.1 | XX-C2158C6.3    | lincRNA | 0.7948  | 0.2283 | 0.29 | -1.80 | HORAS137 |
| ENSG00000236743.1 | RP5-857K21.15   | lincRNA | 0.5028  | 0.1448 | 0.29 | -1.80 | HORAS138 |
| ENSG00000254153.1 | CTA-398F10.2    | lincRNA | 0.6164  | 0.1782 | 0.29 | -1.79 | HORAS139 |
| ENSG00000253844.1 | RP11-546K22.1   | lincRNA | 0.6164  | 0.1782 | 0.29 | -1.79 | HORAS140 |
| ENSG00000262094.1 | AC139099.5      | lincRNA | 0.8273  | 0.2394 | 0.29 | -1.79 | HORAS141 |
| ENSG00000265369.2 | U3              | lincRNA | 5.0447  | 1.4644 | 0.29 | -1.78 | HORAS142 |
| ENSG00000182586.3 | LINC00334       | lincRNA | 0.6488  | 0.1893 | 0.29 | -1.78 | HORAS143 |
| ENSG00000254605.1 | RP11-626H12.2   | lincRNA | 0.5515  | 0.1615 | 0.29 | -1.77 | HORAS144 |
| ENSG00000271943.1 | RP11-222K16.1   | lincRNA | 0.5677  | 0.1670 | 0.29 | -1.76 | HORAS145 |
| ENSG00000255983.1 | RP11-1038A11.1  | lincRNA | 2.0925  | 0.6181 | 0.30 | -1.76 | HORAS146 |
| ENSG00000267321.1 | RP11-1094M14.11 | lincRNA | 7.6887  | 2.2718 | 0.30 | -1.76 | HORAS147 |
| ENSG00000271991.1 | RP11-79O8.1     | lincRNA | 0.5839  | 0.1726 | 0.30 | -1.76 | HORAS148 |
| ENSG00000240980.1 | RP11-734K21.4   | lincRNA | 0.4704  | 0.1392 | 0.30 | -1.76 | HORAS149 |
| ENSG00000224568.1 | AC096669.3      | lincRNA | 0.4704  | 0.1392 | 0.30 | -1.76 | HORAS150 |
| ENSG00000225105.2 | LINC01076       | lincRNA | 0.4704  | 0.1392 | 0.30 | -1.76 | HORAS151 |
| ENSG00000231817.3 | RP11-189B4.6    | lincRNA | 0.4704  | 0.1392 | 0.30 | -1.76 | HORAS152 |
| ENSG00000272515.1 | RP11-29P20.1    | lincRNA | 0.4704  | 0.1392 | 0.30 | -1.76 | HORAS153 |
| ENSG00000227467.3 | RP11-169D4.1    | lincRNA | 0.4866  | 0.1448 | 0.30 | -1.75 | HORAS154 |
| ENSG00000249094.2 | RP1-7G5.6       | lincRNA | 0.4866  | 0.1448 | 0.30 | -1.75 | HORAS155 |
| ENSG00000223379.1 | RP11-374M1.4    | lincRNA | 0.5028  | 0.1503 | 0.30 | -1.74 | HORAS156 |
| ENSG00000176840.7 | MIR7-3HG        | lincRNA | 0.5028  | 0.1503 | 0.30 | -1.74 | HORAS157 |
| ENSG00000229647.1 | AC007879.7      | lincRNA | 0.5191  | 0.1559 | 0.30 | -1.74 | HORAS158 |
| ENSG00000238837.3 | RP11-646E18.2   | lincRNA | 0.5191  | 0.1559 | 0.30 | -1.74 | HORAS159 |
| ENSG00000272853.1 | RP11-398C13.6   | lincRNA | 3.5686  | 1.0747 | 0.30 | -1.73 | HORAS160 |
| ENSG00000251443.1 | RP11-113I22.1   | lincRNA | 0.5353  | 0.1615 | 0.30 | -1.73 | HORAS161 |

|                   |                |         |         |        |      |       |          |
|-------------------|----------------|---------|---------|--------|------|-------|----------|
| ENSG00000272192.1 | CTD-2532N20.1  | lincRNA | 0.5353  | 0.1615 | 0.30 | -1.73 | HORAS162 |
| ENSG00000267421.2 | AC005498.3     | lincRNA | 0.8110  | 0.2450 | 0.30 | -1.73 | HORAS163 |
| ENSG00000253821.1 | RP11-246K15.1  | lincRNA | 27.4780 | 8.3022 | 0.30 | -1.73 | HORAS164 |
| ENSG00000242147.1 | RP13-463N16.6  | lincRNA | 0.5515  | 0.1670 | 0.30 | -1.72 | HORAS165 |
| ENSG00000227718.1 | AC016730.1     | lincRNA | 6.0990  | 1.8486 | 0.30 | -1.72 | HORAS166 |
| ENSG00000269942.1 | RP11-29B2.5    | lincRNA | 0.8435  | 0.2561 | 0.30 | -1.72 | HORAS167 |
| ENSG00000272275.1 | RP11-791G15.2  | lincRNA | 6.0504  | 1.8375 | 0.30 | -1.72 | HORAS168 |
| ENSG00000271926.1 | CTD-2376I4.1   | lincRNA | 0.5677  | 0.1726 | 0.30 | -1.72 | HORAS169 |
| ENSG00000272338.1 | RP11-722E23.2  | lincRNA | 0.7137  | 0.2172 | 0.30 | -1.72 | HORAS170 |
| ENSG00000228022.1 | HCG20          | lincRNA | 0.5839  | 0.1782 | 0.31 | -1.71 | HORAS171 |
| ENSG00000231535.1 | LINC00278      | lincRNA | 0.7299  | 0.2227 | 0.31 | -1.71 | HORAS172 |
| ENSG00000260360.1 | RP11-533E19.5  | lincRNA | 0.6002  | 0.1838 | 0.31 | -1.71 | HORAS173 |
| ENSG00000248161.1 | RP11-499E18.1  | lincRNA | 0.6002  | 0.1838 | 0.31 | -1.71 | HORAS174 |
| ENSG00000228397.1 | RP1-224A6.3    | lincRNA | 0.4542  | 0.1392 | 0.31 | -1.71 | HORAS175 |
| ENSG00000237292.1 | RP11-540K16.1  | lincRNA | 0.4542  | 0.1392 | 0.31 | -1.71 | HORAS176 |
| ENSG00000236452.1 | AC123023.1     | lincRNA | 0.4542  | 0.1392 | 0.31 | -1.71 | HORAS177 |
| ENSG00000225647.1 | AC005487.2     | lincRNA | 1.3625  | 0.4176 | 0.31 | -1.71 | HORAS178 |
| ENSG00000253154.1 | CTA-392E5.1    | lincRNA | 0.4542  | 0.1392 | 0.31 | -1.71 | HORAS179 |
| ENSG00000256084.1 | RP11-134N1.2   | lincRNA | 0.4542  | 0.1392 | 0.31 | -1.71 | HORAS180 |
| ENSG00000257431.1 | RP11-263K4.3   | lincRNA | 0.4542  | 0.1392 | 0.31 | -1.71 | HORAS181 |
| ENSG00000258942.1 | RP11-255G12.2  | lincRNA | 0.4542  | 0.1392 | 0.31 | -1.71 | HORAS182 |
| ENSG00000258383.1 | CTD-2200A16.1  | lincRNA | 0.4542  | 0.1392 | 0.31 | -1.71 | HORAS183 |
| ENSG00000260834.1 | RP11-256I9.2   | lincRNA | 0.4542  | 0.1392 | 0.31 | -1.71 | HORAS184 |
| ENSG00000264174.1 | RP11-212E8.1   | lincRNA | 0.4542  | 0.1392 | 0.31 | -1.71 | HORAS185 |
| ENSG00000272715.1 | RP4-753F5.1    | lincRNA | 0.4704  | 0.1448 | 0.31 | -1.70 | HORAS186 |
| ENSG00000250098.1 | RP11-22A3.1    | lincRNA | 0.4704  | 0.1448 | 0.31 | -1.70 | HORAS187 |
| ENSG00000250697.1 | CTD-2066L21.3  | lincRNA | 0.4704  | 0.1448 | 0.31 | -1.70 | HORAS188 |
| ENSG00000271897.1 | RP11-679B17.2  | lincRNA | 0.4704  | 0.1448 | 0.31 | -1.70 | HORAS189 |
| ENSG00000255314.1 | RP11-702F3.3   | lincRNA | 0.4704  | 0.1448 | 0.31 | -1.70 | HORAS190 |
| ENSG00000258066.1 | RP11-781A6.1   | lincRNA | 0.4704  | 0.1448 | 0.31 | -1.70 | HORAS191 |
| ENSG00000257958.1 | RP11-25E2.1    | lincRNA | 0.4704  | 0.1448 | 0.31 | -1.70 | HORAS192 |
| ENSG00000234503.1 | KB-1592A4.14   | lincRNA | 0.4704  | 0.1448 | 0.31 | -1.70 | HORAS193 |
| ENSG00000228127.1 | RP11-12L8.1    | lincRNA | 0.4866  | 0.1503 | 0.31 | -1.69 | HORAS194 |
| ENSG00000226302.1 | RP11-528N21.1  | lincRNA | 0.4866  | 0.1503 | 0.31 | -1.69 | HORAS195 |
| ENSG00000261462.1 | CTA-254O6.1    | lincRNA | 0.4866  | 0.1503 | 0.31 | -1.69 | HORAS196 |
| ENSG00000258279.2 | LINC00592      | lincRNA | 0.4866  | 0.1503 | 0.31 | -1.69 | HORAS197 |
| ENSG00000237772.1 | AC092620.3     | lincRNA | 0.6651  | 0.2060 | 0.31 | -1.69 | HORAS198 |
| ENSG00000225982.1 | RP11-538D16.3  | lincRNA | 0.5028  | 0.1559 | 0.31 | -1.69 | HORAS199 |
| ENSG00000270697.1 | RP11-381K20.4  | lincRNA | 0.5028  | 0.1559 | 0.31 | -1.69 | HORAS200 |
| ENSG00000245812.2 | RP11-175K6.1   | lincRNA | 0.5028  | 0.1559 | 0.31 | -1.69 | HORAS201 |
| ENSG00000273019.1 | RP11-508N22.13 | lincRNA | 0.5028  | 0.1559 | 0.31 | -1.69 | HORAS202 |
| ENSG00000259783.1 | RP11-1006G14.2 | lincRNA | 0.5028  | 0.1559 | 0.31 | -1.69 | HORAS203 |
| ENSG00000261447.1 | RP11-109D9.4   | lincRNA | 0.6813  | 0.2116 | 0.31 | -1.69 | HORAS204 |
| ENSG00000272922.1 | RP11-329B9.5   | lincRNA | 0.5191  | 0.1615 | 0.31 | -1.68 | HORAS205 |
| ENSG00000248489.1 | CTD-2007H13.3  | lincRNA | 1.0381  | 0.3230 | 0.31 | -1.68 | HORAS206 |
| ENSG00000254288.1 | RP11-6I2.3     | lincRNA | 0.5191  | 0.1615 | 0.31 | -1.68 | HORAS207 |
| ENSG00000261671.1 | RP11-573G6.6   | lincRNA | 0.5191  | 0.1615 | 0.31 | -1.68 | HORAS208 |
| ENSG00000256199.1 | RP11-439H13.2  | lincRNA | 0.5191  | 0.1615 | 0.31 | -1.68 | HORAS209 |
| ENSG00000259362.2 | RP11-307C19.1  | lincRNA | 0.5191  | 0.1615 | 0.31 | -1.68 | HORAS210 |
| ENSG00000267224.1 | AC005498.4     | lincRNA | 0.5191  | 0.1615 | 0.31 | -1.68 | HORAS211 |
| ENSG00000266176.1 | RP11-855A2.5   | lincRNA | 0.5353  | 0.1670 | 0.31 | -1.68 | HORAS212 |
| ENSG00000269246.1 | CTC-246B18.10  | lincRNA | 0.5677  | 0.1782 | 0.31 | -1.67 | HORAS213 |
| ENSG00000270761.1 | RP11-385F7.1   | lincRNA | 1.3301  | 0.4176 | 0.31 | -1.67 | HORAS214 |
| ENSG00000224687.1 | RASAL2-AS1     | lincRNA | 0.7624  | 0.2394 | 0.31 | -1.67 | HORAS215 |
| ENSG00000260025.1 | RP11-490M8.1   | lincRNA | 0.7624  | 0.2394 | 0.31 | -1.67 | HORAS216 |

|                   |               |         |         |        |      |       |          |
|-------------------|---------------|---------|---------|--------|------|-------|----------|
| ENSG00000272931.1 | RP5-943J3.2   | lincRNA | 0.5839  | 0.1838 | 0.31 | -1.67 | HORAS217 |
| ENSG00000240219.1 | RP11-430C7.5  | lincRNA | 0.5839  | 0.1838 | 0.31 | -1.67 | HORAS218 |
| ENSG00000231606.1 | RP11-344F13.1 | lincRNA | 0.6002  | 0.1893 | 0.32 | -1.66 | HORAS219 |
| ENSG00000231734.4 | RP6-206I17.2  | lincRNA | 1.2003  | 0.3786 | 0.32 | -1.66 | HORAS220 |
| ENSG00000215866.3 | RP11-426L16.8 | lincRNA | 2.4169  | 0.7628 | 0.32 | -1.66 | HORAS221 |
| ENSG00000230978.1 | LINC00160     | lincRNA | 0.6164  | 0.1949 | 0.32 | -1.66 | HORAS222 |
| ENSG00000257698.1 | RP11-620J15.3 | lincRNA | 7.2669  | 2.3052 | 0.32 | -1.66 | HORAS223 |
| ENSG00000272672.1 | RP11-302M6.5  | lincRNA | 0.4380  | 0.1392 | 0.32 | -1.65 | HORAS224 |
| ENSG00000232347.1 | RP11-488L18.8 | lincRNA | 0.4380  | 0.1392 | 0.32 | -1.65 | HORAS225 |
| ENSG00000223373.1 | AC108066.1    | lincRNA | 0.4380  | 0.1392 | 0.32 | -1.65 | HORAS226 |
| ENSG00000251567.1 | RP11-775H9.2  | lincRNA | 0.4380  | 0.1392 | 0.32 | -1.65 | HORAS227 |
| ENSG00000249752.1 | RP11-563M4.1  | lincRNA | 0.4380  | 0.1392 | 0.32 | -1.65 | HORAS228 |
| ENSG00000249781.2 | CTD-2143L24.1 | lincRNA | 0.4380  | 0.1392 | 0.32 | -1.65 | HORAS229 |
| ENSG00000249199.1 | CTD-2139B15.5 | lincRNA | 0.4380  | 0.1392 | 0.32 | -1.65 | HORAS230 |
| ENSG00000251518.1 | CTD-2130F23.2 | lincRNA | 0.4380  | 0.1392 | 0.32 | -1.65 | HORAS231 |
| ENSG00000248942.1 | CTD-2275D24.4 | lincRNA | 0.4380  | 0.1392 | 0.32 | -1.65 | HORAS232 |
| ENSG00000249073.1 | CTD-2131I18.1 | lincRNA | 0.4380  | 0.1392 | 0.32 | -1.65 | HORAS233 |
| ENSG00000226497.1 | RP11-406O16.1 | lincRNA | 0.4380  | 0.1392 | 0.32 | -1.65 | HORAS234 |
| ENSG00000231533.1 | RP1-232L24.3  | lincRNA | 0.4380  | 0.1392 | 0.32 | -1.65 | HORAS235 |
| ENSG00000272137.1 | RP11-177G23.2 | lincRNA | 0.4380  | 0.1392 | 0.32 | -1.65 | HORAS236 |
| ENSG00000272905.1 | RP11-265E18.1 | lincRNA | 0.4380  | 0.1392 | 0.32 | -1.65 | HORAS237 |
| ENSG00000254321.1 | RP11-495O10.1 | lincRNA | 0.4380  | 0.1392 | 0.32 | -1.65 | HORAS238 |
| ENSG00000261710.1 | RP11-953B20.1 | lincRNA | 0.4380  | 0.1392 | 0.32 | -1.65 | HORAS239 |
| ENSG00000228467.2 | RP11-402N8.1  | lincRNA | 0.4380  | 0.1392 | 0.32 | -1.65 | HORAS240 |
| ENSG00000254434.1 | CTD-2555I5.1  | lincRNA | 0.4380  | 0.1392 | 0.32 | -1.65 | HORAS241 |
| ENSG00000261703.1 | RP11-327F22.5 | lincRNA | 0.4380  | 0.1392 | 0.32 | -1.65 | HORAS242 |
| ENSG00000273335.1 | RP11-61L19.2  | lincRNA | 0.4380  | 0.1392 | 0.32 | -1.65 | HORAS243 |
| ENSG00000271784.1 | RP1-28H20.3   | lincRNA | 0.4380  | 0.1392 | 0.32 | -1.65 | HORAS244 |
| ENSG00000236871.2 | LINC00106     | lincRNA | 0.4380  | 0.1392 | 0.32 | -1.65 | HORAS245 |
| ENSG00000236120.2 | RP11-733O18.1 | lincRNA | 0.4380  | 0.1392 | 0.32 | -1.65 | HORAS246 |
| ENSG00000205837.3 | LINC00487     | lincRNA | 0.4542  | 0.1448 | 0.32 | -1.65 | HORAS247 |
| ENSG00000272180.1 | RP11-481J13.1 | lincRNA | 0.4542  | 0.1448 | 0.32 | -1.65 | HORAS248 |
| ENSG00000224844.1 | AC107079.1    | lincRNA | 0.4542  | 0.1448 | 0.32 | -1.65 | HORAS249 |
| ENSG00000249588.1 | CTC-537E7.1   | lincRNA | 0.4542  | 0.1448 | 0.32 | -1.65 | HORAS250 |
| ENSG00000254038.1 | RP11-419C23.1 | lincRNA | 0.4542  | 0.1448 | 0.32 | -1.65 | HORAS251 |
| ENSG00000253115.1 | RP11-6I2.4    | lincRNA | 0.4542  | 0.1448 | 0.32 | -1.65 | HORAS252 |
| ENSG00000273415.1 | RP11-702B10.2 | lincRNA | 0.4542  | 0.1448 | 0.32 | -1.65 | HORAS253 |
| ENSG00000255727.1 | RP11-508P1.2  | lincRNA | 0.4542  | 0.1448 | 0.32 | -1.65 | HORAS254 |
| ENSG00000258977.1 | RP11-799P8.1  | lincRNA | 0.4542  | 0.1448 | 0.32 | -1.65 | HORAS255 |
| ENSG00000267364.1 | RP11-47L3.1   | lincRNA | 0.4542  | 0.1448 | 0.32 | -1.65 | HORAS256 |
| ENSG00000272709.1 | RP11-458D21.6 | lincRNA | 1.1517  | 0.3675 | 0.32 | -1.65 | HORAS257 |
| ENSG00000233975.1 | RP11-288L9.1  | lincRNA | 0.4704  | 0.1503 | 0.32 | -1.65 | HORAS258 |
| ENSG00000259928.1 | RP11-218M11.1 | lincRNA | 0.4704  | 0.1503 | 0.32 | -1.65 | HORAS259 |
| ENSG00000269729.1 | AC006262.4    | lincRNA | 0.4704  | 0.1503 | 0.32 | -1.65 | HORAS260 |
| ENSG00000223804.1 | RP6-206I17.1  | lincRNA | 10.2029 | 3.2630 | 0.32 | -1.64 | HORAS261 |
| ENSG00000226281.2 | RP1-80N2.2    | lincRNA | 0.4866  | 0.1559 | 0.32 | -1.64 | HORAS262 |
| ENSG00000229720.1 | RP3-495K2.2   | lincRNA | 0.7299  | 0.2339 | 0.32 | -1.64 | HORAS263 |
| ENSG00000267785.1 | CTD-3194G12.2 | lincRNA | 0.4866  | 0.1559 | 0.32 | -1.64 | HORAS264 |
| ENSG00000251665.1 | RP11-700H6.2  | lincRNA | 0.4866  | 0.1559 | 0.32 | -1.64 | HORAS265 |
| ENSG00000249426.1 | CTC-448D22.1  | lincRNA | 0.5028  | 0.1615 | 0.32 | -1.64 | HORAS266 |
| ENSG00000273297.1 | RP11-38M8.1   | lincRNA | 0.5028  | 0.1615 | 0.32 | -1.64 | HORAS267 |
| ENSG00000272282.1 | RP11-222K16.2 | lincRNA | 0.5191  | 0.1670 | 0.32 | -1.64 | HORAS268 |
| ENSG00000249396.1 | RP11-1C1.4    | lincRNA | 0.5353  | 0.1726 | 0.32 | -1.63 | HORAS269 |
| ENSG00000234902.2 | AC007879.2    | lincRNA | 0.5515  | 0.1782 | 0.32 | -1.63 | HORAS270 |
| ENSG00000251291.1 | RP11-400D2.3  | lincRNA | 0.5515  | 0.1782 | 0.32 | -1.63 | HORAS271 |

|                    |                 |         |        |        |      |       |          |
|--------------------|-----------------|---------|--------|--------|------|-------|----------|
| ENSG00000258100.1  | RP11-121E16.1   | lincRNA | 0.5515 | 0.1782 | 0.32 | -1.63 | HORAS272 |
| ENSG00000225156.2  | AC012354.6      | lincRNA | 0.5677 | 0.1838 | 0.32 | -1.63 | HORAS273 |
| ENSG00000238062.1  | AC105344.2      | lincRNA | 0.5677 | 0.1838 | 0.32 | -1.63 | HORAS274 |
| ENSG00000185044.10 | RP11-435B5.4    | lincRNA | 6.8290 | 2.2106 | 0.32 | -1.63 | HORAS275 |
| ENSG00000260588.1  | RP11-930P14.2   | lincRNA | 1.8492 | 0.6014 | 0.33 | -1.62 | HORAS276 |
| ENSG00000272829.1  | XXbac-B135H6.18 | lincRNA | 1.2328 | 0.4009 | 0.33 | -1.62 | HORAS277 |
| ENSG00000223891.1  | OSER1-AS1       | lincRNA | 5.5962 | 1.8208 | 0.33 | -1.62 | HORAS278 |
| ENSG00000233730.1  | RP4-666F24.3    | lincRNA | 0.9570 | 0.3118 | 0.33 | -1.62 | HORAS279 |
| ENSG00000272065.1  | U91328.20       | lincRNA | 0.6488 | 0.2116 | 0.33 | -1.62 | HORAS280 |
| ENSG00000273403.1  | RP11-329B9.3    | lincRNA | 0.6813 | 0.2227 | 0.33 | -1.61 | HORAS281 |
| ENSG00000257433.1  | RP1-197B17.3    | lincRNA | 1.4112 | 0.4622 | 0.33 | -1.61 | HORAS282 |
| ENSG00000267890.1  | CTD-2126E3.4    | lincRNA | 0.7299 | 0.2394 | 0.33 | -1.61 | HORAS283 |
| ENSG00000269961.1  | CTD-2033C11.1   | lincRNA | 0.8110 | 0.2673 | 0.33 | -1.60 | HORAS284 |
| ENSG00000215859.4  | RP6-74O6.2      | lincRNA | 0.4217 | 0.1392 | 0.33 | -1.60 | HORAS285 |
| ENSG00000243636.1  | RP11-164O23.7   | lincRNA | 0.4217 | 0.1392 | 0.33 | -1.60 | HORAS286 |
| ENSG00000232679.1  | RP11-400N13.3   | lincRNA | 0.4217 | 0.1392 | 0.33 | -1.60 | HORAS287 |
| ENSG00000234362.1  | AC104654.2      | lincRNA | 0.4217 | 0.1392 | 0.33 | -1.60 | HORAS288 |
| ENSG00000230923.1  | LINC00309       | lincRNA | 0.4217 | 0.1392 | 0.33 | -1.60 | HORAS289 |
| ENSG00000236780.1  | AC078941.1      | lincRNA | 0.4217 | 0.1392 | 0.33 | -1.60 | HORAS290 |
| ENSG00000235519.1  | AC012075.2      | lincRNA | 0.4217 | 0.1392 | 0.33 | -1.60 | HORAS291 |
| ENSG00000272774.1  | RP11-433A10.3   | lincRNA | 0.4217 | 0.1392 | 0.33 | -1.60 | HORAS292 |
| ENSG00000242339.1  | RP11-735B13.2   | lincRNA | 0.4217 | 0.1392 | 0.33 | -1.60 | HORAS293 |
| ENSG00000250125.1  | RP11-707A18.1   | lincRNA | 0.4217 | 0.1392 | 0.33 | -1.60 | HORAS294 |
| ENSG00000249275.1  | RP11-364P22.2   | lincRNA | 0.4217 | 0.1392 | 0.33 | -1.60 | HORAS295 |
| ENSG00000271334.1  | CTD-2078B5.2    | lincRNA | 0.4217 | 0.1392 | 0.33 | -1.60 | HORAS296 |
| ENSG00000260192.1  | RP11-756H20.1   | lincRNA | 0.4217 | 0.1392 | 0.33 | -1.60 | HORAS297 |
| ENSG00000254298.1  | CTB-17P3.4      | lincRNA | 0.4217 | 0.1392 | 0.33 | -1.60 | HORAS298 |
| ENSG00000237530.1  | RP3-449H6.1     | lincRNA | 0.4217 | 0.1392 | 0.33 | -1.60 | HORAS299 |
| ENSG00000272915.1  | RP11-62J1.4     | lincRNA | 0.4217 | 0.1392 | 0.33 | -1.60 | HORAS300 |
| ENSG00000254026.1  | RP11-369E15.2   | lincRNA | 0.4217 | 0.1392 | 0.33 | -1.60 | HORAS301 |
| ENSG00000253679.1  | KB-1410C5.2     | lincRNA | 0.4217 | 0.1392 | 0.33 | -1.60 | HORAS302 |
| ENSG00000254227.1  | RP11-622O11.4   | lincRNA | 0.4217 | 0.1392 | 0.33 | -1.60 | HORAS303 |
| ENSG00000227917.1  | RP11-143M1.3    | lincRNA | 0.4217 | 0.1392 | 0.33 | -1.60 | HORAS304 |
| ENSG00000232035.1  | RP11-87N24.3    | lincRNA | 0.4217 | 0.1392 | 0.33 | -1.60 | HORAS305 |
| ENSG00000227809.1  | RP11-171A24.2   | lincRNA | 0.4217 | 0.1392 | 0.33 | -1.60 | HORAS306 |
| ENSG00000230109.1  | RP11-275N1.1    | lincRNA | 0.4217 | 0.1392 | 0.33 | -1.60 | HORAS307 |
| ENSG00000235356.1  | RP11-428G2.1    | lincRNA | 0.4217 | 0.1392 | 0.33 | -1.60 | HORAS308 |
| ENSG00000241317.1  | RP11-342M3.1    | lincRNA | 0.4217 | 0.1392 | 0.33 | -1.60 | HORAS309 |
| ENSG00000255243.1  | CTD-2507G9.1    | lincRNA | 0.4217 | 0.1392 | 0.33 | -1.60 | HORAS310 |
| ENSG00000254669.1  | RP5-945I17.2    | lincRNA | 0.4217 | 0.1392 | 0.33 | -1.60 | HORAS311 |
| ENSG00000254885.1  | RP11-802F5.1    | lincRNA | 0.4217 | 0.1392 | 0.33 | -1.60 | HORAS312 |
| ENSG00000254874.1  | RP11-676F20.1   | lincRNA | 0.4217 | 0.1392 | 0.33 | -1.60 | HORAS313 |
| ENSG00000256427.1  | RP11-118B22.4   | lincRNA | 0.4217 | 0.1392 | 0.33 | -1.60 | HORAS314 |
| ENSG00000256373.1  | RP11-711K1.8    | lincRNA | 0.4217 | 0.1392 | 0.33 | -1.60 | HORAS315 |
| ENSG00000257435.1  | RP11-267D19.1   | lincRNA | 0.4217 | 0.1392 | 0.33 | -1.60 | HORAS316 |
| ENSG00000260030.1  | RP11-686F15.2   | lincRNA | 0.4217 | 0.1392 | 0.33 | -1.60 | HORAS317 |
| ENSG00000257477.1  | RP11-753H16.4   | lincRNA | 0.4217 | 0.1392 | 0.33 | -1.60 | HORAS318 |
| ENSG00000258084.1  | RP11-754N21.1   | lincRNA | 0.4217 | 0.1392 | 0.33 | -1.60 | HORAS319 |
| ENSG00000258338.1  | RP11-87P13.2    | lincRNA | 0.4217 | 0.1392 | 0.33 | -1.60 | HORAS320 |
| ENSG00000257725.1  | RP11-654D12.3   | lincRNA | 0.4217 | 0.1392 | 0.33 | -1.60 | HORAS321 |
| ENSG00000259124.1  | RP11-187O7.3    | lincRNA | 0.4217 | 0.1392 | 0.33 | -1.60 | HORAS322 |
| ENSG00000259527.1  | LINC00052       | lincRNA | 0.4217 | 0.1392 | 0.33 | -1.60 | HORAS323 |
| ENSG00000260071.1  | RP11-418I22.2   | lincRNA | 0.4217 | 0.1392 | 0.33 | -1.60 | HORAS324 |
| ENSG00000236377.1  | AC084809.3      | lincRNA | 0.4217 | 0.1392 | 0.33 | -1.60 | HORAS325 |
| ENSG00000264488.1  | RP11-605F20.1   | lincRNA | 0.4217 | 0.1392 | 0.33 | -1.60 | HORAS326 |

|                   |                  |         |         |         |      |       |          |
|-------------------|------------------|---------|---------|---------|------|-------|----------|
| ENSG00000263611.1 | RP11-612A1.1     | lincRNA | 0.4217  | 0.1392  | 0.33 | -1.60 | HORAS327 |
| ENSG00000260433.1 | RP11-202D1.2     | lincRNA | 0.4217  | 0.1392  | 0.33 | -1.60 | HORAS328 |
| ENSG00000227075.1 | AP000472.3       | lincRNA | 0.4217  | 0.1392  | 0.33 | -1.60 | HORAS329 |
| ENSG00000229962.1 | AP000221.1       | lincRNA | 0.4217  | 0.1392  | 0.33 | -1.60 | HORAS330 |
| ENSG00000226527.1 | AP000289.6       | lincRNA | 0.4217  | 0.1392  | 0.33 | -1.60 | HORAS331 |
| ENSG00000224592.1 | RP5-884C9.2      | lincRNA | 0.4380  | 0.1448  | 0.33 | -1.60 | HORAS332 |
| ENSG00000223675.1 | RP11-86H7.6      | lincRNA | 0.4380  | 0.1448  | 0.33 | -1.60 | HORAS333 |
| ENSG00000238122.1 | RP11-483I13.2    | lincRNA | 0.4380  | 0.1448  | 0.33 | -1.60 | HORAS334 |
| ENSG00000234283.1 | RP11-495P10.6    | lincRNA | 0.4380  | 0.1448  | 0.33 | -1.60 | HORAS335 |
| ENSG00000228437.1 | RP11-400N13.2    | lincRNA | 0.4380  | 0.1448  | 0.33 | -1.60 | HORAS336 |
| ENSG00000233005.1 | AC067959.1       | lincRNA | 0.4380  | 0.1448  | 0.33 | -1.60 | HORAS337 |
| ENSG00000242790.1 | RP11-451G4.3     | lincRNA | 0.4380  | 0.1448  | 0.33 | -1.60 | HORAS338 |
| ENSG00000251688.1 | RP11-752L20.5    | lincRNA | 0.4380  | 0.1448  | 0.33 | -1.60 | HORAS339 |
| ENSG00000250786.1 | SNHG18           | lincRNA | 0.4380  | 0.1448  | 0.33 | -1.60 | HORAS340 |
| ENSG00000272403.1 | RP1-93H18.7      | lincRNA | 0.4380  | 0.1448  | 0.33 | -1.60 | HORAS341 |
| ENSG00000228495.1 | LINC01013        | lincRNA | 0.4380  | 0.1448  | 0.33 | -1.60 | HORAS342 |
| ENSG00000253452.1 | RP11-473J6.1     | lincRNA | 0.4380  | 0.1448  | 0.33 | -1.60 | HORAS343 |
| ENSG00000224549.1 | RP11-370B11.3    | lincRNA | 0.4380  | 0.1448  | 0.33 | -1.60 | HORAS344 |
| ENSG00000260100.1 | RP11-220I1.5     | lincRNA | 0.4380  | 0.1448  | 0.33 | -1.60 | HORAS345 |
| ENSG00000256733.1 | RP11-881M11.8    | lincRNA | 0.4380  | 0.1448  | 0.33 | -1.60 | HORAS346 |
| ENSG00000249388.1 | RP11-834C11.6    | lincRNA | 0.4380  | 0.1448  | 0.33 | -1.60 | HORAS347 |
| ENSG00000256763.1 | RP1-116K23.1     | lincRNA | 0.4380  | 0.1448  | 0.33 | -1.60 | HORAS348 |
| ENSG00000223626.1 | LINC01044        | lincRNA | 0.4380  | 0.1448  | 0.33 | -1.60 | HORAS349 |
| ENSG00000260756.1 | RP11-609N14.1    | lincRNA | 0.4380  | 0.1448  | 0.33 | -1.60 | HORAS350 |
| ENSG00000260201.1 | RP11-143N13.2    | lincRNA | 0.4380  | 0.1448  | 0.33 | -1.60 | HORAS351 |
| ENSG00000260963.1 | RP11-297L17.2    | lincRNA | 0.4380  | 0.1448  | 0.33 | -1.60 | HORAS352 |
| ENSG00000263489.1 | CTC-264K15.6     | lincRNA | 0.4380  | 0.1448  | 0.33 | -1.60 | HORAS353 |
| ENSG00000264699.1 | RP11-421N8.2     | lincRNA | 0.4380  | 0.1448  | 0.33 | -1.60 | HORAS354 |
| ENSG00000225877.1 | AC004603.4       | lincRNA | 0.4380  | 0.1448  | 0.33 | -1.60 | HORAS355 |
| ENSG00000229484.1 | RP5-888M10.2     | lincRNA | 0.4542  | 0.1503  | 0.33 | -1.60 | HORAS356 |
| ENSG00000272371.1 | RP11-25O10.2     | lincRNA | 0.4542  | 0.1503  | 0.33 | -1.60 | HORAS357 |
| ENSG00000272823.1 | RP11-295M18.6    | lincRNA | 0.4542  | 0.1503  | 0.33 | -1.60 | HORAS358 |
| ENSG00000225916.1 | AC007879.4       | lincRNA | 0.4542  | 0.1503  | 0.33 | -1.60 | HORAS359 |
| ENSG00000242258.1 | LINC00996        | lincRNA | 0.4542  | 0.1503  | 0.33 | -1.60 | HORAS360 |
| ENSG00000254337.1 | RP11-865I6.2     | lincRNA | 0.4542  | 0.1503  | 0.33 | -1.60 | HORAS361 |
| ENSG00000223716.2 | RP11-113O24.3    | lincRNA | 0.4542  | 0.1503  | 0.33 | -1.60 | HORAS362 |
| ENSG00000256686.1 | RP11-443N24.2    | lincRNA | 0.4542  | 0.1503  | 0.33 | -1.60 | HORAS363 |
| ENSG00000240006.1 | RP11-200A1.1     | lincRNA | 0.4704  | 0.1559  | 0.33 | -1.59 | HORAS364 |
| ENSG00000249173.1 | RP11-701P16.4    | lincRNA | 0.4704  | 0.1559  | 0.33 | -1.59 | HORAS365 |
| ENSG00000249740.1 | CTD-2127H9.1     | lincRNA | 0.4704  | 0.1559  | 0.33 | -1.59 | HORAS366 |
| ENSG00000253652.1 | RP11-798K23.4    | lincRNA | 0.4704  | 0.1559  | 0.33 | -1.59 | HORAS367 |
| ENSG00000232505.2 | XXbac-BPG308J9.3 | lincRNA | 0.4704  | 0.1559  | 0.33 | -1.59 | HORAS368 |
| ENSG00000237359.1 | RP11-509J21.2    | lincRNA | 0.4704  | 0.1559  | 0.33 | -1.59 | HORAS369 |
| ENSG00000231193.1 | RP11-462B18.2    | lincRNA | 0.4704  | 0.1559  | 0.33 | -1.59 | HORAS370 |
| ENSG00000226792.2 | LINC00371        | lincRNA | 0.4704  | 0.1559  | 0.33 | -1.59 | HORAS371 |
| ENSG00000259469.1 | RP11-227D13.4    | lincRNA | 0.4704  | 0.1559  | 0.33 | -1.59 | HORAS372 |
| ENSG00000269387.1 | RP11-298J23.8    | lincRNA | 0.4866  | 0.1615  | 0.33 | -1.59 | HORAS373 |
| ENSG00000270638.1 | RP3-466P17.1     | lincRNA | 0.4866  | 0.1615  | 0.33 | -1.59 | HORAS374 |
| ENSG00000226676.1 | RP11-589B3.6     | lincRNA | 0.4866  | 0.1615  | 0.33 | -1.59 | HORAS375 |
| ENSG00000229425.1 | AJ006998.2       | lincRNA | 0.4866  | 0.1615  | 0.33 | -1.59 | HORAS376 |
| ENSG00000269893.2 | SNHG8            | lincRNA | 89.9606 | 29.8623 | 0.33 | -1.59 | HORAS377 |
| ENSG00000176754.8 | LINC00303        | lincRNA | 0.5028  | 0.1670  | 0.33 | -1.59 | HORAS378 |
| ENSG00000233569.1 | RP11-500B12.1    | lincRNA | 1.5085  | 0.5011  | 0.33 | -1.59 | HORAS379 |
| ENSG00000237248.3 | LINC00987        | lincRNA | 0.5028  | 0.1670  | 0.33 | -1.59 | HORAS380 |
| ENSG00000259113.1 | RP11-406H23.2    | lincRNA | 0.5028  | 0.1670  | 0.33 | -1.59 | HORAS381 |

|                   |                |         |        |        |      |       |                 |
|-------------------|----------------|---------|--------|--------|------|-------|-----------------|
| ENSG00000269736.1 | CTD-2521M24.11 | lincRNA | 0.5028 | 0.1670 | 0.33 | -1.59 | <i>HORAS382</i> |
| ENSG00000259763.1 | RP11-327J17.1  | lincRNA | 0.5191 | 0.1726 | 0.33 | -1.59 | <i>HORAS383</i> |
| ENSG00000227477.1 | STK4-AS1       | lincRNA | 0.5191 | 0.1726 | 0.33 | -1.59 | <i>HORAS384</i> |
| ENSG00000234944.1 | RP11-124O11.1  | lincRNA | 1.0706 | 0.3564 | 0.33 | -1.59 | <i>HORAS385</i> |
| ENSG00000270069.1 | RP6-99M1.2     | lincRNA | 0.5515 | 0.1838 | 0.33 | -1.59 | <i>HORAS386</i> |
