# Supplementary material for: The long noncoding RNA HORAS5 mediates castration‐resistant prostate cancer survival by activating the androgen receptor transcriptional program
Source: PubMed Central journal article supplement (PMC6487714; doi:10.1002/1878-0261.12471), 2019-03-05
Supplement: MOL2-13-1121-s015.pdf [file MOL2-13-1121-s015.pdf]

**Supplemental Table 3: List of proteins that are up-regulated (FC>=3) upon HORAS5 knockdown in LNCaP cells**

| Rank# | Protein names                                                                                                                                | Gene names       | Fold Change<br>siHORAS5/siN<br>C (normalized) |
|-------|----------------------------------------------------------------------------------------------------------------------------------------------|------------------|-----------------------------------------------|
| 1     | Eukaryotic translation elongation factor 1 epsilon-1                                                                                         | EEF1E1           | 10.165                                        |
| 2     | Probable cytosolic iron-sulfur protein assembly protein CIAO1                                                                                | CIAO1            | 8.9602                                        |
| 3     | Phosphoserine aminotransferase                                                                                                               | PSAT1            | 6.9971                                        |
| 4     | Elongation factor Ts, mitochondrial                                                                                                          | TSFM             | 6.7498                                        |
| 5     | Nucleolar protein 6                                                                                                                          | NOL6             | 6.1906                                        |
| 6     | Zinc finger protein 512                                                                                                                      | ZNF512           | 6.0879                                        |
| 7     | Transmembrane protein 205                                                                                                                    | TMEM205          | 5.7629                                        |
| 8     | Mitochondrial carrier homolog 2                                                                                                              | MTCH2            | 5.7424                                        |
| 9     | Dipeptidyl peptidase 3                                                                                                                       | DPP3             | 5.6693                                        |
| 10    | Ubiquitin-protein ligase E3C                                                                                                                 | UBE3C            | 5.2132                                        |
| 11    | 40S ribosomal protein S8                                                                                                                     | RPS8             | 5.1103                                        |
| 12    | N-acetyltransferase 10                                                                                                                       | NAT10            | 5.0264                                        |
| 13    | 60S ribosomal protein L27                                                                                                                    | RPL27            | 4.9793                                        |
| 14    | 60S ribosomal protein L7a                                                                                                                    | RPL7A            | 4.9669                                        |
|       | Probable global transcription activator SNF2L1;SWI/SNF-related matrix-associated actin-dependent regulator of chromatin subfamily A member 5 | SMARCA1;SMARC A5 | 4.9262                                        |
| 15    | subfamily A member 5                                                                                                                         | A5               | 4.9262                                        |
| 16    | Basic leucine zipper and W2 domain-containing protein 2                                                                                      | BZW2             | 4.8769                                        |
| 17    | Vesicle-trafficking protein SEC22b                                                                                                           | SEC22B           | 4.8385                                        |
| 18    | Serine--tRNA ligase, mitochondrial                                                                                                           | SARS2            | 4.7727                                        |
| 19    | Very-long-chain enoyl-CoA reductase                                                                                                          | TECR             | 4.6856                                        |
| 20    | Epoxide hydrolase 1                                                                                                                          | EPHX1            | 4.6202                                        |
| 21    | Prohibitin-2                                                                                                                                 | PHB2             | 4.6193                                        |
|       | 40S ribosomal protein S26;Putative 40S ribosomal protein S26-like                                                                            |                  |                                               |
| 22    | 1                                                                                                                                            | RPS26;RPS26P11   | 4.5978                                        |
| 23    | V-type proton ATPase subunit H                                                                                                               | ATP6V1H          | 4.5671                                        |
| 24    | 60S ribosomal protein L6                                                                                                                     | RPL6             | 4.4989                                        |
| 25    | Retinol dehydrogenase 11                                                                                                                     | RDH11            | 4.4976                                        |
| 26    | Tricarboxylate transport protein, mitochondrial                                                                                              | SLC25A1          | 4.4325                                        |
| 27    | Mannose-6-phosphate isomerase                                                                                                                | MPI              | 4.396                                         |
| 28    | 39S ribosomal protein L3, mitochondrial                                                                                                      | MRPL3            | 4.3662                                        |
| 29    | 40S ribosomal protein S2                                                                                                                     | RPS2             | 4.3635                                        |
| 30    | rRNA 2-O-methyltransferase fibrillar                                                                                                         | FBL              | 4.3516                                        |
| 31    | HEAT repeat-containing protein 5B                                                                                                            | HEATR5B          | 4.3458                                        |
| 32    | Cytochrome c oxidase subunit 2                                                                                                               | MT-CO2           | 4.1739                                        |
| 33    | 7-dehydrocholesterol reductase                                                                                                               | DHCR7            | 4.1476                                        |
| 34    | Sideroflexin-3                                                                                                                               | SFXN3            | 4.1313                                        |
| 35    | ATP-binding cassette sub-family F member 3                                                                                                   | ABCF3            | 4.1228                                        |
| 36    | 40S ribosomal protein S9                                                                                                                     | RPS9             | 4.1048                                        |
| 37    | Coatomer subunit zeta-1                                                                                                                      | COPZ1            | 4.0837                                        |
| 38    | Dehydrogenase/reductase SDR family member 4                                                                                                  | DHRS4            | 4.0654                                        |
| 39    | 60S ribosomal protein L4                                                                                                                     | RPL4             | 4.0596                                        |
| 40    | Leucine--tRNA ligase, cytoplasmic                                                                                                            | LARS             | 4.0543                                        |
| 41    | Ubiquitin-like protein ISG15                                                                                                                 | ISG15            | 4.0515                                        |
| 42    | Ras-related protein Rab-14                                                                                                                   | RAB14            | 4.0481                                        |
| 43    | 60S ribosomal protein L3                                                                                                                     | RPL3             | 4.0388                                        |
| 44    | Glucosylceramidase                                                                                                                           | GBA              | 4.0203                                        |

|    |                                                                   |              |        |
|----|-------------------------------------------------------------------|--------------|--------|
| 45 | Fructose-bisphosphate aldolase;Fructose-bisphosphate aldolase C   | ALDOC        | 4.0084 |
| 46 | NADH dehydrogenase [ubiquinone] flavoprotein 1, mitochondrial     | NDUFV1       | 4.0039 |
| 47 | Protein RRP5 homolog                                              | PDCD11       | 3.992  |
| 48 | RNA-binding protein NOB1                                          | NOB1         | 3.9747 |
| 49 | N-alpha-acetyltransferase 15, NatA auxiliary subunit              | NAA15        | 3.9695 |
| 50 | m7GpppX diphosphatase                                             | DCPS         | 3.9589 |
|    | Alpha-N-acetylglucosaminidase;Alpha-N-acetylglucosaminidase 82    |              |        |
| 51 | kDa form;Alpha-N-acetylglucosaminidase 77 kDa form                | NAGLU        | 3.954  |
| 52 | Cystathionine beta-synthase                                       | CBS          | 3.9425 |
| 53 | Ribosomal protein L15;60S ribosomal protein L15                   | RPL15        | 3.9408 |
| 54 | AP-2 complex subunit beta                                         | AP2B1        | 3.9404 |
| 55 | Nucleolar RNA helicase 2                                          | DDX21        | 3.9296 |
| 56 | Pescadillo homolog                                                | PES1         | 3.9277 |
| 57 | 60S ribosomal protein L13a                                        | RPL13A       | 3.9029 |
| 58 | 4-trimethylaminobutyraldehyde dehydrogenase                       | ALDH9A1      | 3.8939 |
| 59 | Squamous cell carcinoma antigen recognized by T-cells 3           | SART3        | 3.876  |
| 60 | Dipeptidyl peptidase 2                                            | DPP7         | 3.8637 |
|    | Protein arginine N-methyltransferase 5;Protein arginine N-        |              |        |
| 61 | methyltransferase 5, N-terminally processed                       | PRMT5        | 3.8442 |
| 62 | Pyridoxal kinase                                                  | PDXK         | 3.8436 |
|    | Ras-related C3 botulinum toxin substrate 1;Ras-related C3         |              |        |
| 63 | botulinum toxin substrate 3                                       | RAC1;RAC3    | 3.8412 |
| 64 | Nucleolar protein 58                                              | NOP58        | 3.8194 |
| 65 | Nitrilase homolog 1                                               | NIT1         | 3.8148 |
| 66 | 39S ribosomal protein L16, mitochondrial                          | MRPL16       | 3.8099 |
| 67 | Cytochrome b-c1 complex subunit 2, mitochondrial                  | UQCRC2       | 3.807  |
|    | Dolichyl-diphosphooligosaccharide--protein glycosyltransferase 48 |              |        |
| 68 | kDa subunit                                                       | DDOST        | 3.8026 |
| 69 | Sideroflexin-1                                                    | SFXN1        | 3.8019 |
| 70 | 60S ribosomal protein L13                                         | RPL13        | 3.7923 |
| 71 | Importin-4                                                        | IPO4         | 3.7887 |
| 72 | 60S ribosomal protein L23                                         | RPL23        | 3.7762 |
| 73 | Ribosomal L1 domain-containing protein 1                          | RSL1D1       | 3.775  |
|    | Bifunctional glutamate/proline--tRNA ligase;Glutamate--tRNA       |              |        |
| 74 | ligase;Proline--tRNA ligase                                       | EPRS         | 3.7622 |
| 75 | Isoleucine--tRNA ligase, cytoplasmic                              | IARS         | 3.7573 |
| 76 | Vesicle-fusing ATPase                                             | NSF          | 3.7331 |
| 77 | Electron transfer flavoprotein subunit alpha, mitochondrial       | ETFA         | 3.7254 |
| 78 | Coatomer subunit alpha;Xenin;Proxenin                             | COPA         | 3.7251 |
| 79 | 40S ribosomal protein S27-like;40S ribosomal protein S27          | RPS27;RPS27L | 3.723  |
|    | Branched-chain-amino-acid aminotransferase,                       |              |        |
| 80 | mitochondrial;Branched-chain-amino-acid aminotransferase          | BCAT2        | 3.7138 |
| 81 | Arginine--tRNA ligase, cytoplasmic                                | RARS         | 3.7102 |
| 82 | 60S ribosomal protein L21                                         | RPL21        | 3.6967 |
| 83 | Nicotinate phosphoribosyltransferase                              | NAPRT1       | 3.6923 |
| 84 | Leukotriene A-4 hydrolase                                         | LTA4H        | 3.6864 |
| 85 | T-complex protein 1 subunit gamma                                 | CCT3         | 3.6809 |
| 86 | WD repeat-containing protein 82                                   | WDR82        | 3.679  |
| 87 | Actin-related protein 2/3 complex subunit 3                       | ARPC3        | 3.6623 |
| 88 | Secretory carrier-associated membrane protein 1                   | SCAMP1       | 3.6571 |
|    | Phosphoglycerate mutase 1;Probable phosphoglycerate mutase 4      |              |        |
| 89 | Serine/threonine-protein phosphatase 2A 55 kDa regulatory         | PGAM1;PGAM4  | 3.6562 |
| 90 | subunit B alpha isoform                                           | PPP2R2A      | 3.6439 |

|                                                                                                                                           |               |        |
|-------------------------------------------------------------------------------------------------------------------------------------------|---------------|--------|
| 91 60S ribosomal protein L7                                                                                                               | RPL7          | 3.6368 |
| 92 Apoptosis-inducing factor 1, mitochondrial                                                                                             | AIFM1         | 3.6326 |
| 93 Casein kinase II subunit alpha<br>NADH dehydrogenase [ubiquinone] iron-sulfur protein 2,<br>mitochondrial                              | CSNK2A1       | 3.6317 |
| 94 60S ribosomal protein L27a                                                                                                             | NDUFS2        | 3.6145 |
| 95 Citrate synthase;Citrate synthase, mitochondrial<br>ATP synthase subunit gamma;ATP synthase subunit gamma,<br>mitochondrial            | RPL27A        | 3.6084 |
| 96 DNA-dependent protein kinase catalytic subunit<br>Structural maintenance of chromosomes flexible hinge domain-<br>containing protein 1 | CS            | 3.567  |
| 97 40S ribosomal protein S6                                                                                                               | ATP5C1        | 3.561  |
| 98 6-phosphofructokinase, liver type                                                                                                      | PRKDC         | 3.5587 |
| 99 N-acetylgalactosaminyltransferase 7                                                                                                    | SMCHD1        | 3.5576 |
| 100 Guanidinoacetate N-methyltransferase                                                                                                  | RPS6          | 3.5457 |
| 101 Procollagen-lysine,2-oxoglutarate 5-dioxygenase 1                                                                                     | PFKL          | 3.5359 |
| 102 6-phosphofructokinase, muscle type                                                                                                    | GALNT7        | 3.5261 |
| 103 Delta(14)-sterol reductase                                                                                                            | GAMT          | 3.5139 |
| 104 Pre-mRNA-processing-splicing factor 8                                                                                                 | PLOD1         | 3.5075 |
| 105 AP2-associated protein kinase 1                                                                                                       | PFKM          | 3.5021 |
| 106 Surfeit locus protein 4                                                                                                               | TM7SF2        | 3.4938 |
| 107 Fatty aldehyde dehydrogenase                                                                                                          | PRPF8         | 3.4906 |
| 108 Inositol-tetrakisphosphate 1-kinase                                                                                                   | AAK1          | 3.4699 |
| 109 N-acetylserotonin O-methyltransferase-like protein                                                                                    | SURF4         | 3.453  |
| 110 60S ribosomal protein L35a                                                                                                            | ALDH3A2       | 3.4464 |
| 111 SPRY domain-containing protein 7<br>Serine/threonine-protein phosphatase 2A 56 kDa regulatory<br>subunit delta isoform                | ITPK1         | 3.4435 |
| 112 60S ribosomal protein L8                                                                                                              | ASMTL         | 3.4415 |
| 113 ATP-binding cassette sub-family F member 2                                                                                            | RPL35A        | 3.4314 |
| 114 Selenocysteine-specific elongation factor                                                                                             | SPRYD7        | 3.4299 |
| 115 Myosin-14                                                                                                                             | PPP2R5D       | 3.423  |
| 116 Protein NipSnap homolog 1                                                                                                             | RPL8          | 3.4216 |
| 117 60S ribosomal protein L24                                                                                                             | ABCF2         | 3.4198 |
| 118 ATP synthase subunit b, mitochondrial                                                                                                 | EEFSEC        | 3.4077 |
| 119 UDP-glucose 6-dehydrogenase                                                                                                           | MYH14         | 3.3967 |
| 120 DnaJ homolog subfamily C member 11                                                                                                    | NIPSNAP1      | 3.3914 |
| 121 Cysteine dioxygenase type 1                                                                                                           | RPL24         | 3.3829 |
| 122 Heat shock protein 75 kDa, mitochondrial<br>Trifunctional enzyme subunit beta, mitochondrial;3-ketoacyl-CoA<br>thiolase               | ATP5F1        | 3.3809 |
| 123 V-type proton ATPase subunit B, brain isoform                                                                                         | UGDH          | 3.3751 |
| 124 Protein NipSnap homolog 2<br>ATPase family AAA domain-containing protein 3A;ATPase family<br>AAA domain-containing protein 3B         | DNAJC11       | 3.3727 |
| 125 Transmembrane protein 43                                                                                                              | CDO1          | 3.3683 |
| 126 Translin-associated protein X                                                                                                         | TRAP1         | 3.3625 |
| 127 Sideroflexin-4                                                                                                                        | HADHB         | 3.3616 |
| 128 40S ribosomal protein S7                                                                                                              | ATP6V1B2      | 3.3592 |
| 129 6-phosphogluconolactonase                                                                                                             | GBAS          | 3.3543 |
| 130 Clathrin heavy chain 1                                                                                                                | ATAD3A;ATAD3B | 3.3492 |
| 131 NF-kappa-B-repressing factor                                                                                                          | TMEM43        | 3.3474 |
| 132 60S ribosomal protein L10;60S ribosomal protein L10-like                                                                              | TSNAX         | 3.3342 |
| 133 ADP-dependent glucokinase                                                                                                             | SFXN4         | 3.3222 |
|                                                                                                                                           | RPS7          | 3.311  |
|                                                                                                                                           | PGLS          | 3.3087 |
|                                                                                                                                           | CLTC          | 3.3033 |
|                                                                                                                                           | NKRF          | 3.3022 |
|                                                                                                                                           | RPL10;RPL10L  | 3.2885 |
|                                                                                                                                           | ADPGK         | 3.2865 |

|     |                                                                                                                                                                                                                                 |                      |        |
|-----|---------------------------------------------------------------------------------------------------------------------------------------------------------------------------------------------------------------------------------|----------------------|--------|
| 140 | V-type proton ATPase catalytic subunit A                                                                                                                                                                                        | ATP6V1A              | 3.2815 |
| 141 | Nucleoside diphosphate-linked moiety X motif 19, mitochondrial                                                                                                                                                                  | NUDT19               | 3.28   |
| 142 | Peroxisomal acyl-coenzyme A oxidase 1                                                                                                                                                                                           | ACOX1                | 3.2736 |
| 143 | Pyruvate dehydrogenase E1 component subunit beta, mitochondrial                                                                                                                                                                 | PDHB                 | 3.2732 |
| 144 | Phospholipase A-2-activating protein                                                                                                                                                                                            | PLAA                 | 3.2711 |
| 145 | Copine-3                                                                                                                                                                                                                        | CPNE3                | 3.2681 |
| 146 | Serine/threonine-protein phosphatase 2A catalytic subunit alpha isoform;Serine/threonine-protein phosphatase 2A catalytic subunit beta isoform;Serine/threonine-protein phosphatase                                             | PPP2CA;PPP2CB        | 3.2663 |
| 147 | Ras-related protein Rab-8A                                                                                                                                                                                                      | RAB8A                | 3.2638 |
| 148 | Heterogeneous nuclear ribonucleoprotein U                                                                                                                                                                                       | HNRNPU               | 3.2621 |
| 149 | Transmembrane protein 126A                                                                                                                                                                                                      | TMEM126A             | 3.2569 |
| 150 | Beta-adrenergic receptor kinase 1                                                                                                                                                                                               | ADRBK1               | 3.2536 |
| 151 | 60S ribosomal protein L10a                                                                                                                                                                                                      | RPL10A               | 3.2527 |
| 152 | 2-oxoglutarate dehydrogenase, mitochondrial                                                                                                                                                                                     | OGDH                 | 3.2522 |
| 153 | Acyl-coenzyme A thioesterase 1;Acyl-coenzyme A thioesterase 2, mitochondrial                                                                                                                                                    | ACOT1;ACOT2          | 3.2431 |
| 154 | MOSC domain-containing protein 1, mitochondrial                                                                                                                                                                                 | 36951                | 3.2386 |
| 155 | T-complex protein 1 subunit eta                                                                                                                                                                                                 | CCT7                 | 3.2384 |
| 156 | ER membrane protein complex subunit 1                                                                                                                                                                                           | EMC1                 | 3.2313 |
| 157 | U5 small nuclear ribonucleoprotein 40 kDa protein                                                                                                                                                                               | SNRNP40;DKFZp434D199 | 3.2294 |
| 158 | Ribosomal protein 63, mitochondrial                                                                                                                                                                                             | MRP63                | 3.2288 |
| 159 | Proteasome subunit alpha type-2                                                                                                                                                                                                 | PSMA2                | 3.214  |
| 160 | 39S ribosomal protein L38, mitochondrial                                                                                                                                                                                        | MRPL38               | 3.2137 |
| 161 | Nicalin                                                                                                                                                                                                                         | NCLN                 | 3.2043 |
| 162 | Copine-1                                                                                                                                                                                                                        | CPNE1                | 3.203  |
| 163 | Isocitrate dehydrogenase [NADP];Isocitrate dehydrogenase [NADP], mitochondrial                                                                                                                                                  | IDH2                 | 3.2006 |
| 164 | CAD protein;Glutamine-dependent carbamoyl-phosphate synthase;Aspartate carbamoyltransferase;Dihydroorotase                                                                                                                      | CAD                  | 3.1974 |
| 165 | Lipopolysaccharide-responsive and beige-like anchor protein                                                                                                                                                                     | LRBA                 | 3.19   |
| 166 | Caseinolytic peptidase B protein homolog                                                                                                                                                                                        | CLPB                 | 3.1779 |
| 167 | Very long-chain specific acyl-CoA dehydrogenase, mitochondrial                                                                                                                                                                  | ACADVL               | 3.1758 |
| 168 | Heterogeneous nuclear ribonucleoprotein R                                                                                                                                                                                       | HNRNPR               | 3.1634 |
| 169 | C-1-tetrahydrofolate synthase, cytoplasmic;Methylenetetrahydrofolate dehydrogenase;Methenyltetrahydrofolate cyclohydrolase;Formyltetrahydrofolate synthetase;C-1-tetrahydrofolate synthase, cytoplasmic, N-terminally processed | MTHFD1               | 3.1597 |
| 170 | Transmembrane protein 33                                                                                                                                                                                                        | TMEM33               | 3.1543 |
| 171 | WD40 repeat-containing protein SMU1                                                                                                                                                                                             | SMU1                 | 3.1523 |
| 172 | RNA-binding protein Raly                                                                                                                                                                                                        | RALY                 | 3.1433 |
| 173 | Proliferation-associated protein 2G4                                                                                                                                                                                            | PA2G4                | 3.1405 |
| 174 | Phosphate carrier protein, mitochondrial                                                                                                                                                                                        | SLC25A3              | 3.1393 |
| 175 | Growth factor receptor-bound protein 10                                                                                                                                                                                         | GRB10                | 3.1391 |
| 176 | Destrin                                                                                                                                                                                                                         | DSTN                 | 3.1385 |
| 177 | Cleavage and polyadenylation specificity factor subunit 1                                                                                                                                                                       | CPSF1                | 3.1373 |
| 178 | 28S ribosomal protein S28, mitochondrial                                                                                                                                                                                        | MRPS28               | 3.1337 |
| 179 | Ras-related protein Rab-13                                                                                                                                                                                                      | RAB13                | 3.1302 |
| 180 | Voltage-dependent anion-selective channel protein 2                                                                                                                                                                             | VDAC2                | 3.1262 |
| 181 | Bifunctional purine biosynthesis protein PURH;Phosphoribosylaminoimidazolecarboxamide formyltransferase;IMP cyclohydrolase                                                                                                      | ATIC                 | 3.1194 |

|     |                                                                       |                |        |
|-----|-----------------------------------------------------------------------|----------------|--------|
| 182 | Cytoplasmic aconitate hydratase                                       | ACO1;IRP1      | 3.1192 |
| 183 | RNA polymerase-associated protein CTR9 homolog                        | CTR9           | 3.1184 |
| 184 | Methionine--tRNA ligase, cytoplasmic                                  | MARS           | 3.1183 |
| 185 | DNA mismatch repair protein Mlh1                                      | MLH1           | 3.1107 |
|     | Putative phospholipase B-like 2;Putative phospholipase B-like 2 32    |                |        |
| 186 | kDa form;Putative phospholipase B-like 2 45 kDa form                  | PLBD2          | 3.1057 |
| 187 | Mitochondrial 2-oxoglutarate/malate carrier protein                   | SLC25A11       | 3.1049 |
| 188 | NADPH--cytochrome P450 reductase                                      | POR            | 3.0977 |
| 189 | Heterogeneous nuclear ribonucleoprotein A0                            | HNRNPA0        | 3.0976 |
| 190 | Tryptophan--tRNA ligase, cytoplasmic;T1-TrpRS;T2-TrpRS                | WARS           | 3.0964 |
| 191 | Signal transducer and activator of transcription 1-alpha/beta         | STAT1          | 3.0958 |
|     | E3 SUMO-protein ligase RanBP2;Putative peptidyl-prolyl cis-trans      |                |        |
| 192 | isomerase                                                             | RANBP2         | 3.091  |
| 193 | Glutamine--tRNA ligase                                                | QARS           | 3.0906 |
| 194 | Phosphatidylinositol transfer protein alpha isoform                   | PITPNA         | 3.0877 |
|     | Mitochondrial import inner membrane translocase subunit               |                |        |
|     | Tim23;Putative mitochondrial import inner membrane translocase        |                |        |
| 195 | subunit Tim23B                                                        | TIMM23;TIMM23B | 3.075  |
| 196 | 60S ribosomal protein L36                                             | RPL36          | 3.0734 |
|     | ADP/ATP translocase 2;ADP/ATP translocase 2, N-terminally             |                |        |
| 197 | processed                                                             | SLC25A5        | 3.0689 |
| 198 | Cytochrome b-c1 complex subunit 1, mitochondrial                      | UQCRC1         | 3.0672 |
| 199 | 40S ribosomal protein S4, X isoform                                   | RPS4X          | 3.0661 |
| 200 | 5-3 exoribonuclease 2                                                 | XRN2           | 3.0628 |
| 201 | Core histone macro-H2A.1;Histone H2A                                  | H2AFY          | 3.0615 |
| 202 | Purine nucleoside phosphorylase                                       | PNP            | 3.059  |
| 203 | Biliverdin reductase A                                                | BLVRA          | 3.0586 |
| 204 | Heterogeneous nuclear ribonucleoprotein L                             | HNRNPL         | 3.0539 |
| 205 | X-ray repair cross-complementing protein 5                            | XRCC5          | 3.0538 |
| 206 | 60S ribosomal protein L5                                              | RPL5           | 3.0527 |
| 207 | Glutathione S-transferase kappa 1                                     | GSTK1          | 3.0498 |
| 208 | Ubiquitin-like modifier-activating enzyme 1                           | UBA1           | 3.0411 |
| 209 | 26S proteasome non-ATPase regulatory subunit 10                       | PSMD10         | 3.0399 |
|     | Lysosomal alpha-glucosidase;76 kDa lysosomal alpha-                   |                |        |
| 210 | glucosidase;70 kDa lysosomal alpha-glucosidase                        | GAA            | 3.0394 |
| 211 | Moesin                                                                | MSN            | 3.0389 |
|     | Fatty acid synthase;[Acyl-carrier-protein] S-acetyltransferase;[Acyl- |                |        |
|     | carrier-protein] S-malonyltransferase;3-oxoacyl-[acyl-carrier-        |                |        |
|     | protein] synthase;3-oxoacyl-[acyl-carrier-protein] reductase;3-       |                |        |
|     | hydroxyacyl-[acyl-carrier-protein] dehydratase;Enoyl-[acyl-carrier-   |                |        |
| 212 | protein] reductase;Oleoyl-[acyl-carrier-protein] hydrolase            | FASN           | 3.0364 |
| 213 | 39S ribosomal protein L19, mitochondrial                              | MRPL19         | 3.0353 |
| 214 | Elongation factor 1-gamma                                             | EEF1G          | 3.0243 |
|     | Pro-cathepsin H;Cathepsin H mini chain;Cathepsin H;Cathepsin H        |                |        |
| 215 | heavy chain;Cathepsin H light chain                                   | CTSH           | 3.0235 |
| 216 | Cold shock domain-containing protein E1                               | CSDE1          | 3.0217 |
|     | Phosphatidylglycerophosphatase and protein-tyrosine phosphatase       |                |        |
| 217 | 1                                                                     | PTPMT1         | 3.0195 |
| 218 | Armadillo repeat protein deleted in velo-cardio-facial syndrome       | ARVCF          | 3.0176 |
|     | Trifunctional enzyme subunit alpha, mitochondrial;Long-chain          |                |        |
|     | enoyl-CoA hydratase;Long chain 3-hydroxyacyl-CoA                      |                |        |
| 219 | dehydrogenase                                                         | HADHA          | 3.0157 |
| 220 | 26S proteasome non-ATPase regulatory subunit 14                       | PSMD14         | 3.0147 |
| 221 | Striatin-3                                                            | STRN3          | 3.0115 |

|                                                           |        |        |
|-----------------------------------------------------------|--------|--------|
| 222 Beta-hexosaminidase;Beta-hexosaminidase subunit alpha | HEXA   | 3.009  |
| 223 Actin-like protein 6A                                 | ACTL6A | 3.0043 |
| 224 Regulator of chromosome condensation                  | RCC1   | 3.0034 |
