# Supplementary material for: The long noncoding RNA HORAS5 mediates castration‐resistant prostate cancer survival by activating the androgen receptor transcriptional program
Source: PubMed Central journal article supplement (PMC6487714; doi:10.1002/1878-0261.12471), 2019-03-05
Supplement: MOL2-13-1121-s016.pdf [file MOL2-13-1121-s016.pdf]

**Supplemental Table 4: List of proteins that are down-regulated (FC<=3) upon HORAS5 knockdown in LNCaP cells**

| <b>Rank#</b> | <b>Protein names</b>                                                                          | <b>Gene names</b> | <b>Fold Change<br/>siHORAS5/siNC<br/>C (normalized)</b> |
|--------------|-----------------------------------------------------------------------------------------------|-------------------|---------------------------------------------------------|
| 1            | Core-binding factor subunit beta                                                              | CBFB              | 0.033616                                                |
| 2            | Vesicle-associated membrane protein 1                                                         | VAMP1             | 0.1152                                                  |
| 3            | DnaJ homolog subfamily C member 9                                                             | DNAJC9            | 0.12095                                                 |
| 4            | PCNA-associated factor                                                                        | KIAA0101          | 0.18324                                                 |
| 5            | High mobility group protein B2                                                                | HMGB2             | 0.19629                                                 |
| 6            | Protein CASC4                                                                                 | CASC4             | 0.20482                                                 |
| 7            | Short coiled-coil protein<br>Frataxin, mitochondrial;Frataxin intermediate form;Frataxin(56-  | SCOC              | 0.21613                                                 |
| 8            | 210);Frataxin(78-210);Frataxin mature form                                                    | FXN               | 0.23828                                                 |
| 9            | Reticulocalbin-1                                                                              | RCN1              | 0.2383                                                  |
| 10           | Uncharacterized protein C1orf122                                                              | C1orf122          | 0.24014                                                 |
| 11           | Tumor protein D54                                                                             | TPD52L2           | 0.2617                                                  |
| 12           | U6 snRNA-associated Sm-like protein LSm3                                                      | LSM3              | 0.26658                                                 |
| 13           | Translationally-controlled tumor protein                                                      | TPT1              | 0.2675                                                  |
| 14           | Stathmin                                                                                      | STMN1             | 0.27899                                                 |
| 15           | Periphilin-1                                                                                  | PPHLN1            | 0.28428                                                 |
| 16           | Putative monooxygenase p33MONOX                                                               | KIAA1191          | 0.28739                                                 |
| 17           | Lysine-specific demethylase 5B                                                                | JARID1B;KDM5B     | 0.29453                                                 |
| 18           | Wiskott-Aldrich syndrome protein family member 2<br>Lamina-associated polypeptide 2, isoforms | WASF2             | 0.30279                                                 |
| 19           | beta/gamma;Thymopoietin;Thymopentin                                                           | TMPO              | 0.30282                                                 |
| 20           | NFATC2-interacting protein                                                                    | NFATC2IP          | 0.30292                                                 |
| 21           | Alpha-taxilin                                                                                 | TXLNA             | 0.30377                                                 |
| 22           | Eukaryotic translation initiation factor 4H                                                   | EIF4H             | 0.30475                                                 |
| 23           | Specifically androgen-regulated gene protein                                                  | SARG              | 0.30749                                                 |
| 24           | RNA polymerase-associated protein LEO1                                                        | LEO1              | 0.31107                                                 |
| 25           | Heme-binding protein 2                                                                        | HEBP2             | 0.31374                                                 |
| 26           | Leucine-rich repeat flightless-interacting protein 1                                          | LRRFIP1           | 0.31449                                                 |
| 27           | Chromatin assembly factor 1 subunit A                                                         | CHAF1A            | 0.31898                                                 |
| 28           | Translocon-associated protein subunit alpha                                                   | SSR1              | 0.3191                                                  |
| 29           | Transcription cofactor vestigial-like protein 4                                               | VGLL4             | 0.32203                                                 |
| 30           | Ubiquilin-4                                                                                   | UBQLN4            | 0.32364                                                 |
| 31           | Alpha-2-macroglobulin receptor-associated protein                                             | LRPAP1            | 0.3255                                                  |
| 32           | TATA element modulatory factor                                                                | TMF1              | 0.32578                                                 |
| 33           | E3 ubiquitin-protein ligase RNF181                                                            | RNF181            | 0.32802                                                 |
| 34           | Cyclin-dependent kinase inhibitor 1                                                           | CDKN1A            | 0.32994                                                 |
