# Supplementary material for: The long noncoding RNA HORAS5 mediates castration‐resistant prostate cancer survival by activating the androgen receptor transcriptional program
Source: PubMed Central journal article supplement (PMC6487714; doi:10.1002/1878-0261.12471), 2019-03-05
Supplement: MOL2-13-1121-s017.pdf [file MOL2-13-1121-s017.pdf]

**Supplemental Table 5: Top biological concepts significantly associated with genes downregulated upon HORAS5 knockdown.**

| <b>Biological Function</b>                      | <b>P value</b> | <b>Odds Ratio</b> |
|-------------------------------------------------|----------------|-------------------|
| RNA polymerase II-transcription factor activity | 0.001          | 15.1              |
| Unfolded protein binding                        | 0.002          | 12.5              |
| Protein folding                                 | 0.005          | 9.4               |
| Cell proliferation                              | 0.008          | 8                 |
